# Supplementary material for: Immunosuppressive effect of Plantago major on the innate immunity of Galleria mellonella
Source: PeerJ. 2023 Sep 22;11:e15982. doi: 10.7717/peerj.15982 (PMC10519203; doi:10.7717/peerj.15982)
Supplement: Supplemental Information 1 [file peerj-11-15982-s001.xlsx]

## Sheet: 4 saat
	None	Weak	Strong	total		Persentage	None	Weak	Strong		Persentage	None	Weak	Strong		Arcsin	None	Weak	Strong						None	Weak	Strong
UNT	0	6	5	11	255	UNT	0	0.545455	0.454545		UNT	0	54.5455	45.4545		UNT	0	0.576931	0.471862					Untrd	4.09307	66.4228	29.4842
	1	11	3	15			0.0666667	0.733333	0.2			6.66667	73.3333	20			0.0667161	0.823212	0.201358					PBS	6.63022	68.9324	24.4374
	0	8	4	12			0	0.666667	0.333333			0	66.6667	33.3333			0	0.729728	0.339837					Plantago 0,2	18.5532	64.9175	16.5293
	1	8	5	14			0.0714286	0.571429	0.357143			7.14286	57.1429	35.7143			0.0714894	0.608246	0.365207					Plantago 0,4	10.7056	75.815	13.4794
	0	9	2	11			0	0.818182	0.181818			0	81.8182	18.1818			0	0.958242	0.182835					Plantago 0,6	19.2488	68.3031	12.4481
	0	14	7	21			0	0.666667	0.333333			0	66.6667	33.3333			0	0.729728	0.339837					Plantago 0,8	7.15403	80.0058	12.8402
	0	14	6	20			0	0.7	0.3			0	70	30			0	0.775397	0.304693					Plantago 1,0	12.5752	80.4477	6.97707
	2	14	3	19			0.105263	0.736842	0.157895			10.5263	73.6842	15.7895			0.105459	0.828387	0.158558					Plantago 1,2	4.6747	83.0333	12.292
	2	7	4	13			0.153846	0.538462	0.307692			15.3846	53.8462	30.7692			0.15446	0.56861	0.312767					Plantago 1,6	7.41903	75.9998	16.5811
	0	13	3	16			0	0.8125	0.1875			0	81.25	18.75			0	0.948428	0.188616					Plantago 2,0	4.86281	85.5923	9.54486
	1	13	2	16			0.0625	0.8125	0.125			6.25	81.25	12.5			0.0625408	0.948428	0.125328
	3	15	4	22			0.136364	0.681818	0.181818			13.6364	68.1818	18.1818			0.13679	0.750245	0.182835
	1	10	6	17			0.0588235	0.588235	0.352941			5.88235	58.8235	35.2941			0.0588575	0.628875	0.360713
	0	8	7	15			0	0.533333	0.466667			0	53.3333	46.6667			0	0.562536	0.485518
	0	5	10	15			0	0.333333	0.666667			0	33.3333	66.6667			0	0.339837	0.729728
	0	16	2	18			0	0.888889	0.111111			0	88.8889	11.1111			0	1.09491	0.111341
PBS	2	10	3	15	403	PBS	0.133333	0.666667	0.2		PBS	13.3333	66.6667	20		PBS	0.133732	0.729728	0.201358
	3	26	6	35			0.0857143	0.742857	0.171429			8.57143	74.2857	17.1429			0.0858196	0.837328	0.17228
	0	16	8	24			0	0.666667	0.333333			0	66.6667	33.3333			0	0.729728	0.339837
	1	14	4	19			0.0526316	0.736842	0.210526			5.26316	73.6842	21.0526			0.0526559	0.828387	0.212113
	1	13	3	17			0.0588235	0.764706	0.176471			5.88235	76.4706	17.6471			0.0588575	0.870585	0.1774
	2	16	5	23			0.0869565	0.695652	0.217391			8.69565	69.5652	21.7391			0.0870665	0.769327	0.219141
	0	18	10	28			0	0.642857	0.357143			0	64.2857	35.7143			0	0.698222	0.365207
	2	21	8	31			0.0645161	0.677419	0.258065			6.45161	67.7419	25.8065			0.064561	0.744249	0.261018
	4	27	8	39			0.102564	0.692308	0.205128			10.2564	69.2308	20.5128			0.102745	0.764682	0.206595
	3	23	12	38			0.0789474	0.605263	0.315789			7.89474	60.5263	31.5789			0.0790296	0.650096	0.321289
	2	17	9	28			0.0714286	0.607143	0.321429			7.14286	60.7143	32.1429			0.0714894	0.65246	0.327238
	0	12	5	17			0	0.705882	0.294118			0	70.5882	29.4118			0	0.783668	0.298532
	1	19	6	26			0.0384615	0.730769	0.230769			3.84615	73.0769	23.0769			0.038471	0.819448	0.232868
	2	13	4	19			0.105263	0.684211	0.210526			10.5263	68.4211	21.0526			0.105459	0.753521	0.212113
	2	16	5	23			0.0869565	0.695652	0.217391			8.69565	69.5652	21.7391			0.0870665	0.769327	0.219141
	2	15	4	21			0.0952381	0.714286	0.190476			9.52381	71.4286	19.0476			0.0953827	0.795603	0.191647
Plantago 0,2	6	10	4	20	386	Plantago 0,2	0.3	0.5	0.2		Plantago 0,2	30	50	20		Plantago 0,2	0.304693	0.523599	0.201358
	4	5	2	11			0.363636	0.454545	0.181818			36.3636	45.4545	18.1818			0.372169	0.471862	0.182835
	2	18	2	22			0.0909091	0.818182	0.0909091			9.09091	81.8182	9.09091			0.0910348	0.958242	0.0910348
	4	16	5	25			0.16	0.64	0.2			16	64	20			0.160691	0.694498	0.201358
	4	12	8	24			0.166667	0.5	0.333333			16.6667	50	33.3333			0.167448	0.523599	0.339837
	7	11	6	24			0.291667	0.458333	0.25			29.1667	45.8333	25			0.295969	0.476119	0.25268
	4	14	4	22			0.181818	0.636364	0.181818			18.1818	63.6364	18.1818			0.182835	0.689775	0.182835
	5	32	2	39			0.128205	0.820513	0.0512821			12.8205	82.0513	5.12821			0.128559	0.962308	0.0513046
	2	14	6	22			0.0909091	0.636364	0.272727			9.09091	63.6364	27.2727			0.0910348	0.689775	0.276227
	5	16	3	24			0.208333	0.666667	0.125			20.8333	66.6667	12.5			0.209871	0.729728	0.125328
	6	21	8	35			0.171429	0.6	0.228571			17.1429	60	22.8571			0.17228	0.643501	0.23061
	8	17	3	28			0.285714	0.607143	0.107143			28.5714	60.7143	10.7143			0.289752	0.65246	0.107349
	9	24	1	34			0.264706	0.705882	0.0294118			26.4706	70.5882	2.94118			0.267899	0.783668	0.029416
	2	12	4	18			0.111111	0.666667	0.222222			11.1111	66.6667	22.2222			0.111341	0.729728	0.224093
	2	19	1	22			0.0909091	0.863636	0.0454545			9.09091	86.3636	4.54545			0.0910348	1.04244	0.0454702
	1	13	2	16			0.0625	0.8125	0.125			6.25	81.25	12.5			0.0625408	0.948428	0.125328
Plantago 0,4	6	12	2	20	341	Plantago 0,4	0.3	0.6	0.1		Plantago 0,4	30	60	10		Plantago 0,4	0.304693	0.643501	0.100167
	1	18	0	19			0.0526316	0.947368	0			5.26316	94.7368	0			0.0526559	1.24491	0
	1	5	4	10			0.1	0.5	0.4			10	50	40			0.100167	0.523599	0.411517
	6	11	0	17			0.352941	0.647059	0			35.2941	64.7059	0			0.360713	0.703721	0
	6	12	5	23			0.26087	0.521739	0.217391			26.087	52.1739	21.7391			0.263923	0.548888	0.219141
	1	16	4	21			0.047619	0.761905	0.190476			4.7619	76.1905	19.0476			0.0476371	0.866249	0.191647
	4	17	5	26			0.153846	0.653846	0.192308			15.3846	65.3846	19.2308			0.15446	0.712657	0.193513
	2	24	6	32			0.0625	0.75	0.1875			6.25	75	18.75			0.0625408	0.848062	0.188616
	3	20	6	29			0.103448	0.689655	0.206897			10.3448	68.9655	20.6897			0.103634	0.761013	0.208402
	4	25	2	31			0.129032	0.806452	0.0645161			12.9032	80.6452	6.45161			0.129393	0.938126	0.064561
	3	14	3	20			0.15	0.7	0.15			15	70	15			0.150568	0.775397	0.150568
	0	22	6	28			0	0.785714	0.214286			0	78.5714	21.4286			0	0.90385	0.21596
	0	12	0	12			0	1	0			0	100	0			0	1.5708	0
	0	18	2	20			0	0.9	0.1			0	90	10			0	1.11977	0.100167
	0	13	2	15			0	0.866667	0.133333			0	86.6667	13.3333			0	1.04848	0.133732
	0	18	0	18			0	1	0			0	100	0			0	1.5708	0
Plantago 0,6	6	12	1	19	391	Plantago 0,6	0.315789	0.631579	0.0526316		Plantago 0,6	31.5789	63.1579	5.26316		Plantago 0,6	0.321289	0.683588	0.0526559
	9	18	3	30			0.3	0.6	0.1			30	60	10			0.304693	0.643501	0.100167
	7	6	5	18			0.388889	0.333333	0.277778			38.8889	33.3333	27.7778			0.399425	0.339837	0.28148
	4	27	1	32			0.125	0.84375	0.03125			12.5	84.375	3.125			0.125328	1.00423	0.0312551
	2	18	1	21			0.0952381	0.857143	0.047619			9.52381	85.7143	4.7619			0.0953827	1.0297	0.0476371
	5	10	0	15			0.333333	0.666667	0			33.3333	66.6667	0			0.339837	0.729728	0
	8	6	0	14			0.571429	0.428571	0			57.1429	42.8571	0			0.608246	0.442911	0
	3	14	0	17			0.176471	0.823529	0			17.6471	82.3529	0			0.1774	0.967605	0
	1	26	8	35			0.0285714	0.742857	0.228571			2.85714	74.2857	22.8571			0.0285753	0.837328	0.23061
	2	15	5	22			0.0909091	0.681818	0.227273			9.09091	68.1818	22.7273			0.0910348	0.750245	0.229276
	1	24	5	30			0.0333333	0.8	0.166667			3.33333	80	16.6667			0.0333395	0.927295	0.167448
	2	13	0	15			0.133333	0.866667	0			13.3333	86.6667	0			0.133732	1.04848	0
	5	30	7	42			0.119048	0.714286	0.166667			11.9048	71.4286	16.6667			0.119331	0.795603	0.167448
	2	16	6	24			0.0833333	0.666667	0.25			8.33333	66.6667	25			0.0834301	0.729728	0.25268
	3	13	4	20			0.15	0.65	0.2			15	65	20			0.150568	0.707584	0.201358
	5	23	9	37			0.135135	0.621622	0.243243			13.5135	62.1622	24.3243			0.13555	0.670811	0.245708
Plantago 0,8	5	14	3	22	360	Plantago 0,8	0.227273	0.636364	0.136364		Plantago 0,8	22.7273	63.6364	13.6364		Plantago 0,8	0.229276	0.689775	0.13679
	2	11	5	18			0.111111	0.611111	0.277778			11.1111	61.1111	27.7778			0.111341	0.657464	0.28148
	1	10	5	16			0.0625	0.625	0.3125			6.25	62.5	31.25			0.0625408	0.675132	0.317824
	2	23	3	28			0.0714286	0.821429	0.107143			7.14286	82.1429	10.7143			0.0714894	0.963911	0.107349
	2	27	4	33			0.0606061	0.818182	0.121212			6.06061	81.8182	12.1212			0.0606432	0.958242	0.121511
	0	21	4	25			0	0.84	0.16			0	84	16			0	0.997283	0.160691
	2	24	0	26			0.0769231	0.923077	0			7.69231	92.3077	0			0.0769991	1.17601	0
	0	20	0	20			0	1	0			0	100	0			0	1.5708	0
	1	14	1	16			0.0625	0.875	0.0625			6.25	87.5	6.25			0.0625408	1.06544	0.0625408
	0	21	8	29			0	0.724138	0.275862			0	72.4138	27.5862			0	0.809784	0.279486
	2	25	5	32			0.0625	0.78125	0.15625			6.25	78.125	15.625			0.0625408	0.896666	0.156893
	3	10	4	17			0.176471	0.588235	0.235294			17.6471	58.8235	23.5294			0.1774	0.628875	0.237521
	1	17	0	18			0.0555556	0.944444	0			5.55556	94.4444	0			0.0555842	1.2359	0
	1	8	0	9			0.111111	0.888889	0			11.1111	88.8889	0			0.111341	1.09491	0
	2	26	2	30			0.0666667	0.866667	0.0666667			6.66667	86.6667	6.66667			0.0667161	1.04848	0.0667161
	0	18	3	21			0	0.857143	0.142857			0	85.7143	14.2857			0	1.0297	0.143348
Plantago 1,0	6	20	3	29	372	Plantago 1,0	0.206897	0.689655	0.103448		Plantago 1,0	20.6897	68.9655	10.3448		Plantago 1,0	0.208402	0.761013	0.103634
	2	16	6	24			0.0833333	0.666667	0.25			8.33333	66.6667	25			0.0834301	0.729728	0.25268
	3	22	2	27			0.111111	0.814815	0.0740741			11.1111	81.4815	7.40741			0.111341	0.95241	0.074142
	8	20	0	28			0.285714	0.714286	0			28.5714	71.4286	0			0.289752	0.795603	0
	5	14	2	21			0.238095	0.666667	0.0952381			23.8095	66.6667	9.52381			0.240404	0.729728	0.0953827
	3	19	4	26			0.115385	0.730769	0.153846			11.5385	73.0769	15.3846			0.115642	0.819448	0.15446
	2	19	1	22			0.0909091	0.863636	0.0454545			9.09091	86.3636	4.54545			0.0910348	1.04244	0.0454702
	0	32	3	35			0	0.914286	0.0857143			0	91.4286	8.57143			0	1.15374	0.0858196
	2	12	0	14			0.142857	0.857143	0			14.2857	85.7143	0			0.143348	1.0297	0
	5	13	2	20			0.25	0.65	0.1			25	65	10			0.25268	0.707584	0.100167
	3	23	0	26			0.115385	0.884615	0			11.5385	88.4615	0			0.115642	1.08567	0
	2	16	0	18			0.111111	0.888889	0			11.1111	88.8889	0			0.111341	1.09491	0
	0	20	2	22			0	0.909091	0.0909091			0	90.9091	9.09091			0	1.1411	0.0910348
	1	12	0	13			0.0769231	0.923077	0			7.69231	92.3077	0			0.0769991	1.17601	0
	2	13	2	17			0.117647	0.764706	0.117647			11.7647	76.4706	11.7647			0.11792	0.870585	0.11792
	2	28	0	30			0.0666667	0.933333	0			6.66667	93.3333	0			0.0667161	1.20359	0
Plantago 1,2	3	19	1	23	314	Plantago 1,2	0.130435	0.826087	0.0434783		Plantago 1,2	13.0435	82.6087	4.34783		Plantago 1,2	0.130807	0.972128	0.043492
	1	10	2	13			0.0769231	0.769231	0.153846			7.69231	76.9231	15.3846			0.0769991	0.877636	0.15446
	2	13	0	15			0.133333	0.866667	0			13.3333	86.6667	0			0.133732	1.04848	0
	1	27	4	32			0.03125	0.84375	0.125			3.125	84.375	12.5			0.0312551	1.00423	0.125328
	4	31	5	40			0.1	0.775	0.125			10	77.5	12.5			0.100167	0.886715	0.125328
	1	18	1	20			0.05	0.9	0.05			5	90	5			0.0500209	1.11977	0.0500209
	0	14	1	15			0	0.933333	0.0666667			0	93.3333	6.66667			0	1.20359	0.0667161
	1	19	2	22			0.0454545	0.863636	0.0909091			4.54545	86.3636	9.09091			0.0454702	1.04244	0.0910348
	0	9	3	12			0	0.75	0.25			0	75	25			0	0.848062	0.25268
	0	16	1	17			0	0.941176	0.0588235			0	94.1176	5.88235			0	1.2261	0.0588575
	0	16	4	20			0	0.8	0.2			0	80	20			0	0.927295	0.201358
	2	10	4	16			0.125	0.625	0.25			12.5	62.5	25			0.125328	0.675132	0.25268
	0	18	2	20			0	0.9	0.1			0	90	10			0	1.11977	0.100167
	1	16	1	18			0.0555556	0.888889	0.0555556			5.55556	88.8889	5.55556			0.0555842	1.09491	0.0555842
	0	10	3	13			0	0.769231	0.230769			0	76.9231	23.0769			0	0.877636	0.232868
	0	15	3	18			0	0.833333	0.166667			0	83.3333	16.6667			0	0.985111	0.167448
Plantago 1,4	1	29	2	32		Plantago 1,4	0.03125	0.90625	0.0625		Plantago 1,4	3.125	90.625	6.25		Plantago 1,4	0.0312551	1.13433	0.0625408
	5	25	0	30			0.166667	0.833333	0			16.6667	83.3333	0			0.167448	0.985111	0
	4	22	1	27			0.148148	0.814815	0.037037			14.8148	81.4815	3.7037			0.148695	0.95241	0.0370455
	2	15	3	20			0.1	0.75	0.15			10	75	15			0.100167	0.848062	0.150568
	1	27	2	30			0.0333333	0.9	0.0666667			3.33333	90	6.66667			0.0333395	1.11977	0.0667161
	3	19	2	24			0.125	0.791667	0.0833333			12.5	79.1667	8.33333			0.125328	0.913532	0.0834301
	0	16	0	16			0	1	0			0	100	0			0	1.5708	0
	0	12	2	14			0	0.857143	0.142857			0	85.7143	14.2857			0	1.0297	0.143348
	1	21	3	25			0.04	0.84	0.12			4	84	12			0.0400107	0.997283	0.12029
	1	15	0	16			0.0625	0.9375	0			6.25	93.75	0			0.0625408	1.21538	0
	1	23	2	26			0.0384615	0.884615	0.0769231			3.84615	88.4615	7.69231			0.038471	1.08567	0.0769991
	2	19	3	24			0.0833333	0.791667	0.125			8.33333	79.1667	12.5			0.0834301	0.913532	0.125328
	1	21	0	22			0.0454545	0.954545	0			4.54545	95.4545	0			0.0454702	1.26813	0
	1	23	0	24			0.0416667	0.958333	0			4.16667	95.8333	0			0.0416787	1.28111	0
	0	24	1	25			0	0.96	0.04			0	96	4			0	1.287	0.0400107
	1	11	1	13			0.0769231	0.846154	0.0769231			7.69231	84.6154	7.69231			0.0769991	1.00873	0.0769991
Plantago 1,6	0	13	6	19	405	Plantago 1,6	0	0.684211	0.315789		Plantago 1,6	0	68.4211	31.5789		Plantago 1,6	0	0.753521	0.321289
	0	8	5	13			0	0.615385	0.384615			0	61.5385	38.4615			0	0.662874	0.394791
	3	28	1	32			0.09375	0.875	0.03125			9.375	87.5	3.125			0.0938879	1.06544	0.0312551
	0	16	4	20			0	0.8	0.2			0	80	20			0	0.927295	0.201358
	1	26	3	30			0.0333333	0.866667	0.1			3.33333	86.6667	10			0.0333395	1.04848	0.100167
	5	22	2	29			0.172414	0.758621	0.0689655			17.2414	75.8621	6.89655			0.17328	0.861193	0.0690203
	2	18	7	27			0.0740741	0.666667	0.259259			7.40741	66.6667	25.9259			0.074142	0.729728	0.262255
	2	10	1	13			0.153846	0.769231	0.0769231			15.3846	76.9231	7.69231			0.15446	0.877636	0.0769991
	5	22	6	33			0.151515	0.666667	0.181818			15.1515	66.6667	18.1818			0.152101	0.729728	0.182835
	4	12	5	21			0.190476	0.571429	0.238095			19.0476	57.1429	23.8095			0.191647	0.608246	0.240404
	2	27	3	32			0.0625	0.84375	0.09375			6.25	84.375	9.375			0.0625408	1.00423	0.0938879
	2	22	8	32			0.0625	0.6875	0.25			6.25	68.75	25			0.0625408	0.758041	0.25268
	1	14	3	18			0.0555556	0.777778	0.166667			5.55556	77.7778	16.6667			0.0555842	0.891123	0.167448
	1	20	1	22			0.0454545	0.909091	0.0454545			4.54545	90.9091	4.54545			0.0454702	1.1411	0.0454702
	1	26	2	29			0.0344828	0.896552	0.0689655			3.44828	89.6552	6.89655			0.0344896	1.11192	0.0690203
	2	27	6	35			0.0571429	0.771429	0.171429			5.71429	77.1429	17.1429			0.057174	0.881083	0.17228
Plantago 1,8	2	20	2	24		Plantago 1,8	0.0833333	0.833333	0.0833333		Plantago 1,8	8.33333	83.3333	8.33333		Plantago 1,8	0.0834301	0.985111	0.0834301
	2	14	1	17			0.117647	0.823529	0.0588235			11.7647	82.3529	5.88235			0.11792	0.967605	0.0588575
	0	18	2	20			0	0.9	0.1			0	90	10			0	1.11977	0.100167
	0	20	2	22			0	0.909091	0.0909091			0	90.9091	9.09091			0	1.1411	0.0910348
	0	15	0	15			0	1	0			0	100	0			0	1.5708	0
	3	20	1	24			0.125	0.833333	0.0416667			12.5	83.3333	4.16667			0.125328	0.985111	0.0416787
	1	8	2	11			0.0909091	0.727273	0.181818			9.09091	72.7273	18.1818			0.0910348	0.81434	0.182835
	0	19	3	22			0	0.863636	0.136364			0	86.3636	13.6364			0	1.04244	0.13679
	4	18	4	26			0.153846	0.692308	0.153846			15.3846	69.2308	15.3846			0.15446	0.764682	0.15446
	2	16	3	21			0.0952381	0.761905	0.142857			9.52381	76.1905	14.2857			0.0953827	0.866249	0.143348
	2	20	4	26			0.0769231	0.769231	0.153846			7.69231	76.9231	15.3846			0.0769991	0.877636	0.15446
	3	22	6	31			0.0967742	0.709677	0.193548			9.67742	70.9677	19.3548			0.0969259	0.78904	0.194778
	1	13	0	14			0.0714286	0.928571	0			7.14286	92.8571	0			0.0714894	1.19055	0
	1	14	0	15			0.0666667	0.933333	0			6.66667	93.3333	0			0.0667161	1.20359	0
	0	12	1	13			0	0.923077	0.0769231			0	92.3077	7.69231			0	1.17601	0.0769991
	0	20	3	23			0	0.869565	0.130435			0	86.9565	13.0435			0	1.05432	0.130807
Stok	1	23	1	25	361	Stok	0.04	0.92	0.04		Stok	4	92	4		Stok	0.0400107	1.16808	0.0400107
	1	19	1	21			0.047619	0.904762	0.047619			4.7619	90.4762	4.7619			0.0476371	1.13082	0.0476371
	0	19	1	20			0	0.95	0.05			0	95	5			0	1.25324	0.0500209
	2	22	0	24			0.0833333	0.916667	0			8.33333	91.6667	0			0.0834301	1.15966	0
	1	24	1	26			0.0384615	0.923077	0.0384615			3.84615	92.3077	3.84615			0.038471	1.17601	0.038471
	1	16	1	18			0.0555556	0.888889	0.0555556			5.55556	88.8889	5.55556			0.0555842	1.09491	0.0555842
	1	20	0	21			0.047619	0.952381	0			4.7619	95.2381	0			0.0476371	1.26095	0
	3	19	2	24			0.125	0.791667	0.0833333			12.5	79.1667	8.33333			0.125328	0.913532	0.0834301
	2	24	1	27			0.0740741	0.888889	0.037037			7.40741	88.8889	3.7037			0.074142	1.09491	0.0370455
	2	19	3	24			0.0833333	0.791667	0.125			8.33333	79.1667	12.5			0.0834301	0.913532	0.125328
	1	16	1	18			0.0555556	0.888889	0.0555556			5.55556	88.8889	5.55556			0.0555842	1.09491	0.0555842
	1	30	3	34			0.0294118	0.882353	0.0882353			2.94118	88.2353	8.82353			0.029416	1.08084	0.0883502
	0	15	3	18			0	0.833333	0.166667			0	83.3333	16.6667			0	0.985111	0.167448
	0	12	8	20			0	0.6	0.4			0	60	40			0	0.643501	0.411517
	1	15	3	19			0.0526316	0.789474	0.157895			5.26316	78.9474	15.7895			0.0526559	0.909951	0.158558
	1	17	4	22			0.0454545	0.772727	0.181818			4.54545	77.2727	18.1818			0.0454702	0.883127	0.182835

## Sheet: 24 saat
	None	Weak	Strong	Total		Persentage	None	Weak	Strong		Persentage	None	Weak	Strong		Arcsin	None	Weak	Strong						None	Weak	Strong
UNT	1	3	7	11	269	UNT	0.0909091	0.272727	0.636364		UNT	9.09091	27.2727	63.6364		UNT	0.0910348	0.276227	0.689775					Untrd	6.80549	38.382	54.8126
	1	6	10	17			0.0588235	0.352941	0.588235			5.88235	35.2941	58.8235			0.0588575	0.360713	0.628875					PBS	2.67797	40.8593	56.4628
	2	8	10	20			0.1	0.4	0.5			10	40	50			0.100167	0.411517	0.523599					Plantago 0,2	11.7962	73.1717	17.7533
	2	6	9	17			0.117647	0.352941	0.529412			11.7647	35.2941	52.9412			0.11792	0.360713	0.557907					Plantago 0,4	4.81184	75.6349	19.5532
	2	5	9	16			0.125	0.3125	0.5625			12.5	31.25	56.25			0.125328	0.317824	0.597406					Plantago 0,6	3.64537	75.8758	20.4789
	1	8	10	19			0.0526316	0.421053	0.526316			5.26316	42.1053	52.6316			0.0526559	0.434606	0.554262					Plantago 0,8	7.93008	71.382	20.6879
	2	8	11	21			0.0952381	0.380952	0.52381			9.52381	38.0952	52.381			0.0953827	0.390826	0.551317					Plantago 1,0	5.27611	76.2675	18.4564
	2	7	9	18			0.111111	0.388889	0.5			11.1111	38.8889	50			0.111341	0.399425	0.523599					Plantago 1,2	3.07552	71.4896	25.4349
	1	9	12	22			0.0454545	0.409091	0.545455			4.54545	40.9091	54.5455			0.0454702	0.421458	0.576931					Plantago 1,6	6.69371	70.7203	22.586
	2	7	9	18			0.111111	0.388889	0.5			11.1111	38.8889	50			0.111341	0.399425	0.523599					Plantago 2,0	2.27117	83.6552	14.0736
	2	7	6	15			0.133333	0.466667	0.4			13.3333	46.6667	40			0.133732	0.485518	0.411517
	1	9	11	21			0.047619	0.428571	0.52381			4.7619	42.8571	52.381			0.0476371	0.442911	0.551317
	0	9	10	19			0	0.473684	0.526316			0	47.3684	52.6316			0	0.493469	0.554262
	0	3	7	10			0	0.3	0.7			0	30	70			0	0.304693	0.775397
	0	4	7	11			0	0.363636	0.636364			0	36.3636	63.6364			0	0.372169	0.689775
	0	6	8	14			0	0.428571	0.571429			0	42.8571	57.1429			0	0.442911	0.608246
PBS	0	6	9	15	358	PBS	0	0.4	0.6		PBS	0	40	60		PBS	0	0.411517	0.643501
	3	6	10	19			0.157895	0.315789	0.526316			15.7895	31.5789	52.6316			0.158558	0.321289	0.554262
	0	8	11	19			0	0.421053	0.578947			0	42.1053	57.8947			0	0.434606	0.617437
	0	11	15	26			0	0.423077	0.576923			0	42.3077	57.6923			0	0.436838	0.614957
	1	6	9	16			0.0625	0.375	0.5625			6.25	37.5	56.25			0.0625408	0.384397	0.597406
	0	6	8	14			0	0.428571	0.571429			0	42.8571	57.1429			0	0.442911	0.608246
	1	8	9	18			0.0555556	0.444444	0.5			5.55556	44.4444	50			0.0555842	0.460554	0.523599
	0	6	8	14			0	0.428571	0.571429			0	42.8571	57.1429			0	0.442911	0.608246
	1	4	13	18			0.0555556	0.222222	0.722222			5.55556	22.2222	72.2222			0.0555842	0.224093	0.80701
	0	11	11	22			0	0.5	0.5			0	50	50			0	0.523599	0.523599
	1	14	18	33			0.030303	0.424242	0.545455			3.0303	42.4242	54.5455			0.0303077	0.438125	0.576931
	2	12	16	30			0.0666667	0.4	0.533333			6.66667	40	53.3333			0.0667161	0.411517	0.562536
	0	11	17	28			0	0.392857	0.607143			0	39.2857	60.7143			0	0.403736	0.65246
	0	9	11	20			0	0.45	0.55			0	45	55			0	0.466765	0.582364
	0	13	15	28			0	0.464286	0.535714			0	46.4286	53.5714			0	0.482828	0.565353
	0	17	21	38			0	0.447368	0.552632			0	44.7368	55.2632			0	0.463821	0.585518
Plantago 0,2	0	18	9	27	328	Plantago 0,2	0	0.666667	0.333333		Plantago 0,2	0	66.6667	33.3333		Plantago 0,2	0	0.729728	0.339837
	0	10	14	24			0	0.416667	0.583333			0	41.6667	58.3333			0	0.429775	0.622827
	1	13	12	26			0.0384615	0.5	0.461538			3.84615	50	46.1538			0.038471	0.523599	0.479729
	0	14	4	18			0	0.777778	0.222222			0	77.7778	22.2222			0	0.891123	0.224093
	6	16	3	25			0.24	0.64	0.12			24	64	12			0.242366	0.694498	0.12029
	6	14	5	25			0.24	0.56	0.2			24	56	20			0.242366	0.594386	0.201358
	3	13	2	18			0.166667	0.722222	0.111111			16.6667	72.2222	11.1111			0.167448	0.80701	0.111341
	3	11	1	15			0.2	0.733333	0.0666667			20	73.3333	6.66667			0.201358	0.823212	0.0667161
	4	9	2	15			0.266667	0.6	0.133333			26.6667	60	13.3333			0.269933	0.643501	0.133732
	0	20	4	24			0.0416667	0.75	0.0833333			4.16667	75	8.33333			0.0416787	0.848062	0.0834301
	2	24	5	31			0	0.677419	0.0645161			0	67.7419	6.45161			0	0.744249	0.064561
	0	13	3	16			0.125	1.3125	0.0625			12.5	131.25	6.25			0.125328	#NUM!	0.0625408
	1	7	5	13			0.384615	1.23077	0.153846			38.4615	123.077	15.3846			0.394791	#NUM!	0.15446
	0	16	1	17			0.117647	0.941176	0.0588235			11.7647	94.1176	5.88235			0.11792	1.2261	0.0588575
	0	17	2	19			0	0.578947	0.0526316			0	57.8947	5.26316			0	0.617437	0.0526559
	1	11	3	15			0.0666667	0.6	0.133333			6.66667	60	13.3333			0.0667161	0.643501	0.133732
Plantago 0,4	1	6	9	16	332	Plantago 0,4	0.0625	0.375	0.5625		Plantago 0,4	6.25	37.5	56.25		Plantago 0,4	0.0625408	0.384397	0.597406
	1	13	8	22			0.0454545	0.590909	0.363636			4.54545	59.0909	36.3636			0.0454702	0.632185	0.372169
	0	9	3	12			0	0.75	0.25			0	75	25			0	0.848062	0.25268
	2	12	2	16			0.125	0.75	0.125			12.5	75	12.5			0.125328	0.848062	0.125328
	0	13	8	21			0	0.619048	0.380952			0	61.9048	38.0952			0	0.667529	0.390826
	1	18	2	21			0.047619	0.857143	0.0952381			4.7619	85.7143	9.52381			0.0476371	1.0297	0.0953827
	0	21	2	23			0	0.913043	0.0869565			0	91.3043	8.69565			0	1.15068	0.0870665
	2	21	1	24			0.0833333	0.875	0.0416667			8.33333	87.5	4.16667			0.0834301	1.06544	0.0416787
	5	16	2	23			0.217391	0.695652	0.0869565			21.7391	69.5652	8.69565			0.219141	0.769327	0.0870665
	2	16	1	19			0.105263	0.842105	0.0526316			10.5263	84.2105	5.26316			0.105459	1.00118	0.0526559
	0	11	1	12			0	0.916667	0.0833333			0	91.6667	8.33333			0	1.15966	0.0834301
	1	9	2	12			0.0833333	0.75	0.166667			8.33333	75	16.6667			0.0834301	0.848062	0.167448
	0	10	8	18			0	0.555556	0.444444			0	55.5556	44.4444			0	0.589031	0.460554
	0	23	3	26			0	0.884615	0.115385			0	88.4615	11.5385			0	1.08567	0.115642
	0	23	4	27			0	0.851852	0.148148			0	85.1852	14.8148			0	1.01951	0.148695
	0	35	5	40			0	0.875	0.125			0	87.5	12.5			0	1.06544	0.125328
Plantago 0,6	2	16	4	22	355	Plantago 0,6	0.0909091	0.727273	0.181818		Plantago 0,6	9.09091	72.7273	18.1818		Plantago 0,6	0.0910348	0.81434	0.182835
	0	14	4	18			0	0.777778	0.222222			0	77.7778	22.2222			0	0.891123	0.224093
	0	23	5	28			0	0.821429	0.178571			0	82.1429	17.8571			0	0.963911	0.179534
	1	30	3	34			0.0294118	0.882353	0.0882353			2.94118	88.2353	8.82353			0.029416	1.08084	0.0883502
	1	17	1	19			0.0526316	0.894737	0.0526316			5.26316	89.4737	5.26316			0.0526559	1.10784	0.0526559
	1	14	1	16			0.0625	0.875	0.0625			6.25	87.5	6.25			0.0625408	1.06544	0.0625408
	0	22	3	25			0	0.88	0.12			0	88	12			0	1.07586	0.12029
	0	13	4	17			0	0.764706	0.235294			0	76.4706	23.5294			0	0.870585	0.237521
	0	10	3	13			0	0.769231	0.230769			0	76.9231	23.0769			0	0.877636	0.232868
	1	12	2	15			0.0666667	0.8	0.133333			6.66667	80	13.3333			0.0667161	0.927295	0.133732
	1	18	6	25			0.04	0.72	0.24			4	72	24			0.0400107	0.803802	0.242366
	2	10	8	20			0.1	0.5	0.4			10	50	40			0.100167	0.523599	0.411517
	0	13	4	17			0	0.764706	0.235294			0	76.4706	23.5294			0	0.870585	0.237521
	2	17	9	28			0.0714286	0.607143	0.321429			7.14286	60.7143	32.1429			0.0714894	0.65246	0.327238
	1	20	11	32			0.03125	0.625	0.34375			3.125	62.5	34.375			0.0312551	0.675132	0.350907
	1	19	6	26			0.0384615	0.730769	0.230769			3.84615	73.0769	23.0769			0.038471	0.819448	0.232868
Plantago 0,8	6	12	1	19	314	Plantago 0,8	0.315789	0.631579	0.0526316		Plantago 0,8	31.5789	63.1579	5.26316		Plantago 0,8	0.321289	0.683588	0.0526559
	1	6	7	14			0.0714286	0.428571	0.5			7.14286	42.8571	50			0.0714894	0.442911	0.523599
	1	6	3	10			0.1	0.6	0.3			10	60	30			0.100167	0.643501	0.304693
	3	20	6	29			0.103448	0.689655	0.206897			10.3448	68.9655	20.6897			0.103634	0.761013	0.208402
	3	13	5	21			0.142857	0.619048	0.238095			14.2857	61.9048	23.8095			0.143348	0.667529	0.240404
	0	17	4	21			0	0.809524	0.190476			0	80.9524	19.0476			0	0.943341	0.191647
	3	12	3	18			0.166667	0.666667	0.166667			16.6667	66.6667	16.6667			0.167448	0.729728	0.167448
	4	14	2	20			0.2	0.7	0.1			20	70	10			0.201358	0.775397	0.100167
	1	20	3	24			0.0416667	0.833333	0.125			4.16667	83.3333	12.5			0.0416787	0.985111	0.125328
	0	7	7	14			0	0.5	0.5			0	50	50			0	0.523599	0.523599
	0	13	4	17			0	0.764706	0.235294			0	76.4706	23.5294			0	0.870585	0.237521
	0	14	6	20			0	0.7	0.3			0	70	30			0	0.775397	0.304693
	0	14	1	15			0	0.933333	0.0666667			0	93.3333	6.66667			0	1.20359	0.0667161
	2	21	0	23			0.0869565	0.913043	0			8.69565	91.3043	0			0.0870665	1.15068	0
	0	19	5	24			0	0.791667	0.208333			0	79.1667	20.8333			0	0.913532	0.209871
	1	21	3	25			0.04	0.84	0.12			4	84	12			0.0400107	0.997283	0.12029
Plantago 1,0	0	13	4	17	330	Plantago 1,0	0	0.764706	0.235294		Plantago 1,0	0	76.4706	23.5294		Plantago 1,0	0	0.870585	0.237521
	2	10	2	14			0.142857	0.714286	0.142857			14.2857	71.4286	14.2857			0.143348	0.795603	0.143348
	3	14	2	19			0.157895	0.736842	0.105263			15.7895	73.6842	10.5263			0.158558	0.828387	0.105459
	1	18	13	32			0.03125	0.5625	0.40625			3.125	56.25	40.625			0.0312551	0.597406	0.418346
	2	6	6	14			0.142857	0.428571	0.428571			14.2857	42.8571	42.8571			0.143348	0.442911	0.442911
	2	19	1	22			0.0909091	0.863636	0.0454545			9.09091	86.3636	4.54545			0.0910348	1.04244	0.0454702
	3	21	0	24			0.125	0.875	0			12.5	87.5	0			0.125328	1.06544	0
	1	12	3	16			0.0625	0.75	0.1875			6.25	75	18.75			0.0625408	0.848062	0.188616
	0	12	6	18			0	0.666667	0.333333			0	66.6667	33.3333			0	0.729728	0.339837
	3	29	1	33			0.0909091	0.878788	0.030303			9.09091	87.8788	3.0303			0.0910348	1.07332	0.0303077
	0	16	5	21			0	0.761905	0.238095			0	76.1905	23.8095			0	0.866249	0.240404
	0	17	1	18			0	0.944444	0.0555556			0	94.4444	5.55556			0	1.2359	0.0555842
	0	18	6	24			0	0.75	0.25			0	75	25			0	0.848062	0.25268
	0	18	4	22			0	0.818182	0.181818			0	81.8182	18.1818			0	0.958242	0.182835
	0	24	1	25			0	0.96	0.04			0	96	4			0	1.287	0.0400107
	0	8	3	11			0	0.727273	0.272727			0	72.7273	27.2727			0	0.81434	0.276227
Plantago 1,2	2	9	6	17	318	Plantago 1,2	0.117647	0.529412	0.352941		Plantago 1,2	11.7647	52.9412	35.2941		Plantago 1,2	0.11792	0.557907	0.360713
	0	14	8	22			0	0.636364	0.363636			0	63.6364	36.3636			0	0.689775	0.372169
	0	23	7	30			0	0.766667	0.233333			0	76.6667	23.3333			0	0.873633	0.235504
	0	10	4	14			0	0.714286	0.285714			0	71.4286	28.5714			0	0.795603	0.289752
	2	16	6	24			0.0833333	0.666667	0.25			8.33333	66.6667	25			0.0834301	0.729728	0.25268
	1	8	2	11			0.0909091	0.727273	0.181818			9.09091	72.7273	18.1818			0.0910348	0.81434	0.182835
	2	22	9	33			0.0606061	0.666667	0.272727			6.06061	66.6667	27.2727			0.0606432	0.729728	0.276227
	2	17	4	23			0.0869565	0.73913	0.173913			8.69565	73.913	17.3913			0.0870665	0.831778	0.174802
	1	11	7	19			0.0526316	0.578947	0.368421			5.26316	57.8947	36.8421			0.0526559	0.617437	0.37731
	0	12	8	20			0	0.6	0.4			0	60	40			0	0.643501	0.411517
	0	12	3	15			0	0.8	0.2			0	80	20			0	0.927295	0.201358
	0	13	2	15			0	0.866667	0.133333			0	86.6667	13.3333			0	1.04848	0.133732
	0	16	4	20			0	0.8	0.2			0	80	20			0	0.927295	0.201358
	0	12	4	16			0	0.75	0.25			0	75	25			0	0.848062	0.25268
	0	14	3	17			0	0.823529	0.176471			0	82.3529	17.6471			0	0.967605	0.1774
	0	17	5	22			0	0.772727	0.227273			0	77.2727	22.7273			0	0.883127	0.229276
Plantago 1,4	3	13	2	18		Plantago 1,4	0.166667	0.722222	0.111111		Plantago 1,4	16.6667	72.2222	11.1111		Plantago 1,4	0.167448	0.80701	0.111341
	0	13	2	15			0	0.866667	0.133333			0	86.6667	13.3333			0	1.04848	0.133732
	0	10	3	13			0	0.769231	0.230769			0	76.9231	23.0769			0	0.877636	0.232868
	0	14	4	18			0	0.777778	0.222222			0	77.7778	22.2222			0	0.891123	0.224093
	3	20	3	26			0.115385	0.769231	0.115385			11.5385	76.9231	11.5385			0.115642	0.877636	0.115642
	2	14	1	17			0.117647	0.823529	0.0588235			11.7647	82.3529	5.88235			0.11792	0.967605	0.0588575
	0	18	2	20			0	0.9	0.1			0	90	10			0	1.11977	0.100167
	0	20	3	23			0	0.869565	0.130435			0	86.9565	13.0435			0	1.05432	0.130807
	0	17	1	18			0	0.944444	0.0555556			0	94.4444	5.55556			0	1.2359	0.0555842
	0	24	4	28			0	0.857143	0.142857			0	85.7143	14.2857			0	1.0297	0.143348
	0	21	1	22			0	0.954545	0.0454545			0	95.4545	4.54545			0	1.26813	0.0454702
	0	20	2	22			0	0.909091	0.0909091			0	90.9091	9.09091			0	1.1411	0.0910348
	0	16	0	16			0	1	0			0	100	0			0	1.5708	0
	0	27	0	27			0	1	0			0	100	0			0	1.5708	0
	0	12	4	16			0	0.75	0.25			0	75	25			0	0.848062	0.25268
	0	17	2	19			0	0.894737	0.105263			0	89.4737	10.5263			0	1.10784	0.105459
Plantago 1,6	3	17	3	23	344	Plantago 1,6	0.130435	0.73913	0.130435		Plantago 1,6	13.0435	73.913	13.0435		Plantago 1,6	0.130807	0.831778	0.130807
	1	10	5	16			0.0625	0.625	0.3125			6.25	62.5	31.25			0.0625408	0.675132	0.317824
	0	14	7	21			0	0.666667	0.333333			0	66.6667	33.3333			0	0.729728	0.339837
	1	11	7	19			0.0526316	0.578947	0.368421			5.26316	57.8947	36.8421			0.0526559	0.617437	0.37731
	0	11	3	14			0	0.785714	0.214286			0	78.5714	21.4286			0	0.90385	0.21596
	2	18	2	22			0.0909091	0.818182	0.0909091			9.09091	81.8182	9.09091			0.0910348	0.958242	0.0910348
	1	13	5	19			0.0526316	0.684211	0.263158			5.26316	68.4211	26.3158			0.0526559	0.753521	0.266294
	0	14	6	20			0	0.7	0.3			0	70	30			0	0.775397	0.304693
	1	11	9	21			0.047619	0.52381	0.428571			4.7619	52.381	42.8571			0.0476371	0.551317	0.442911
	2	13	3	18			0.111111	0.722222	0.166667			11.1111	72.2222	16.6667			0.111341	0.80701	0.167448
	3	15	2	20			0.15	0.75	0.1			15	75	10			0.150568	0.848062	0.100167
	3	16	7	26			0.115385	0.615385	0.269231			11.5385	61.5385	26.9231			0.115642	0.662874	0.272594
	1	16	1	18			0.0555556	0.888889	0.0555556			5.55556	88.8889	5.55556			0.0555842	1.09491	0.0555842
	2	24	2	28			0.0714286	0.857143	0.0714286			7.14286	85.7143	7.14286			0.0714894	1.0297	0.0714894
	1	19	7	27			0.037037	0.703704	0.259259			3.7037	70.3704	25.9259			0.0370455	0.780597	0.262255
	3	21	8	32			0.09375	0.65625	0.25			9.375	65.625	25			0.0938879	0.715838	0.25268
Plantago 1,8	4	22	2	28		Plantago 1,8	0.142857	0.785714	0.0714286		Plantago 1,8	14.2857	78.5714	7.14286		Plantago 1,8	0.143348	0.90385	0.0714894
	3	12	3	18			0.166667	0.666667	0.166667			16.6667	66.6667	16.6667			0.167448	0.729728	0.167448
	4	11	0	15			0.266667	0.733333	0			26.6667	73.3333	0			0.269933	0.823212	0
	4	18	4	26			0.153846	0.692308	0.153846			15.3846	69.2308	15.3846			0.15446	0.764682	0.15446
	1	5	4	10			0.1	0.5	0.4			10	50	40			0.100167	0.523599	0.411517
	1	15	0	16			0.0625	0.9375	0			6.25	93.75	0			0.0625408	1.21538	0
	2	10	2	14			0.142857	0.714286	0.142857			14.2857	71.4286	14.2857			0.143348	0.795603	0.143348
	2	13	4	19			0.105263	0.684211	0.210526			10.5263	68.4211	21.0526			0.105459	0.753521	0.212113
	0	15	0	15			0	1	0			0	100	0			0	1.5708	0
	0	22	1	23			0	0.956522	0.0434783			0	95.6522	4.34783			0	1.27483	0.043492
	0	17	2	19			0	0.894737	0.105263			0	89.4737	10.5263			0	1.10784	0.105459
	1	20	2	23			0.0434783	0.869565	0.0869565			4.34783	86.9565	8.69565			0.043492	1.05432	0.0870665
	2	15	0	17			0.117647	0.882353	0			11.7647	88.2353	0			0.11792	1.08084	0
	1	8	2	11			0.0909091	0.727273	0.181818			9.09091	72.7273	18.1818			0.0910348	0.81434	0.182835
	2	13	2	17			0.117647	0.764706	0.117647			11.7647	76.4706	11.7647			0.11792	0.870585	0.11792
	4	19	6	29			0.137931	0.655172	0.206897			13.7931	65.5172	20.6897			0.138372	0.714411	0.208402
Stok	1	9	2	12	327	Stok	0.0833333	0.75	0.166667		Stok	8.33333	75	16.6667		Stok	0.0834301	0.848062	0.167448
	1	13	2	16			0.0625	0.8125	0.125			6.25	81.25	12.5			0.0625408	0.948428	0.125328
	0	7	6	13			0	0.538462	0.461538			0	53.8462	46.1538			0	0.56861	0.479729
	0	19	2	21			0	0.904762	0.0952381			0	90.4762	9.52381			0	1.13082	0.0953827
	2	13	3	18			0.111111	0.722222	0.166667			11.1111	72.2222	16.6667			0.111341	0.80701	0.167448
	0	14	2	16			0	0.875	0.125			0	87.5	12.5			0	1.06544	0.125328
	0	11	3	14			0	0.785714	0.214286			0	78.5714	21.4286			0	0.90385	0.21596
	0	18	3	21			0	0.857143	0.142857			0	85.7143	14.2857			0	1.0297	0.143348
	0	26	1	27			0	0.962963	0.037037			0	96.2963	3.7037			0	1.29778	0.0370455
	0	25	0	25			0	1	0			0	100	0			0	1.5708	0
	0	22	3	25			0	0.88	0.12			0	88	12			0	1.07586	0.12029
	1	18	2	21			0.047619	0.857143	0.0952381			4.7619	85.7143	9.52381			0.0476371	1.0297	0.0953827
	0	16	1	17			0	0.941176	0.0588235			0	94.1176	5.88235			0	1.2261	0.0588575
	0	21	4	25			0	0.84	0.16			0	84	16			0	0.997283	0.160691
	2	27	5	34			0.0588235	0.794118	0.147059			5.88235	79.4118	14.7059			0.0588575	0.917554	0.147594
	0	19	3	22			0	0.863636	0.136364			0	86.3636	13.6364			0	1.04244	0.13679
