# Supplementary material for: Immunosuppressive effect of Plantago major on the innate immunity of Galleria mellonella
Source: PeerJ. 2023 Sep 22;11:e15982. doi: 10.7717/peerj.15982 (PMC10519203; doi:10.7717/peerj.15982)
Supplement: Supplemental Information 2 [file peerj-11-15982-s002.xlsx]

## Sheet: 4 hour
	None	Weak	Middle	Strong	Total		%	None	Weak	Middle	Strong		%	None	Weak	Middle	Strong		Arcsin	None	Weak	Middle	Strong			None	Weak	Middle	Strong
Untreated	2	1	2	6	11	11	Untreated	0.181818	0.0909091	0.181818	0.545455		Untreated	18.1818	9.09091	18.1818	54.5455		Untreated	0.182835	0.0910348	0.182835	0.576931		Untreated	18.0239	20.6186	29.9497	31.4078
	2	3	5	5	15	15		0.133333	0.2	0.333333	0.333333			13.3333	20	33.3333	33.3333			0.133732	0.201358	0.339837	0.339837		PBS	19.8921	21.9071	31.2151	26.9857
	1	0	7	4	12	12		0.0833333	0	0.583333	0.333333			8.33333	0	58.3333	33.3333			0.0834301	0	0.622827	0.339837		Plantago 0,2	54.0439	22.6066	14.5056	8.84388
	2	2	8	2	14	14		0.142857	0.142857	0.571429	0.142857			14.2857	14.2857	57.1429	14.2857			0.143348	0.143348	0.608246	0.143348		Plantago 0,4	46.7063	28.3475	17.383	7.5632
	1	2	1	7	11	11		0.0909091	0.181818	0.0909091	0.636364			9.09091	18.1818	9.09091	63.6364			0.0910348	0.182835	0.0910348	0.689775		Plantago 0,6	58.3614	21.0521	14.7887	5.79783
	5	5	6	5	21	21		0.238095	0.238095	0.285714	0.238095			23.8095	23.8095	28.5714	23.8095			0.240404	0.240404	0.289752	0.240404		Plantago 0,8	51.0388	22.0442	20.0423	6.8746
	5	5	7	3	20	20		0.25	0.25	0.35	0.15			25	25	35	15			0.25268	0.25268	0.357571	0.150568		Plantago 1,0	53.2614	26.171	14.8405	5.72711
	2	8	6	3	19	19		0.105263	0.421053	0.315789	0.157895			10.5263	42.1053	31.5789	15.7895			0.105459	0.434606	0.321289	0.158558		Plantago 1,2	46.3827	28.6889	14.266	10.6624
	7	1	2	3	13	13		0.538462	0.0769231	0.153846	0.230769			53.8462	7.69231	15.3846	23.0769			0.56861	0.0769991	0.15446	0.232868		Plantago 1,4	47.6428	31.3395	15.0093	6.00836
	3	0	5	8	16	16		0.1875	0	0.3125	0.5			18.75	0	31.25	50			0.188616	0	0.317824	0.523599		Plantago 1,6	41.4769	19.967	18.7602	19.7959
	2	1	4	9	16	16		0.125	0.0625	0.25	0.5625			12.5	6.25	25	56.25			0.125328	0.0625408	0.25268	0.597406		Plantago 1,8	46.1848	26.0719	17.5084	10.2348
	2	6	7	7	22	22		0.0909091	0.272727	0.318182	0.318182			9.09091	27.2727	31.8182	31.8182			0.0910348	0.276227	0.323811	0.323811		Plantago 2,0	50.5018	29.7613	11.6992	8.03776
	5	2	7	3	17	17		0.294118	0.117647	0.411765	0.176471			29.4118	11.7647	41.1765	17.6471			0.298532	0.11792	0.42439	0.1774
	2	8	3	2	15	15		0.133333	0.533333	0.2	0.133333			13.3333	53.3333	20	13.3333			0.133732	0.562536	0.201358	0.133732
	1	4	4	6	15	15		0.0666667	0.266667	0.266667	0.4			6.66667	26.6667	26.6667	40			0.0667161	0.269933	0.269933	0.411517
	4	8	3	3	18	18		0.222222	0.444444	0.166667	0.166667			22.2222	44.4444	16.6667	16.6667			0.224093	0.460554	0.167448	0.167448
PBS	3	2	6	4	15	15	PBS	0.2	0.133333	0.4	0.266667		PBS	20	13.3333	40	26.6667		PBS	0.201358	0.133732	0.411517	0.269933
	8	7	10	10	35	35		0.228571	0.2	0.285714	0.285714			22.8571	20	28.5714	28.5714			0.23061	0.201358	0.289752	0.289752
	5	5	8	6	24	24		0.208333	0.208333	0.333333	0.25			20.8333	20.8333	33.3333	25			0.209871	0.209871	0.339837	0.25268
	4	5	6	4	19	19		0.210526	0.263158	0.315789	0.210526			21.0526	26.3158	31.5789	21.0526			0.212113	0.266294	0.321289	0.212113
	3	5	5	4	17	17		0.176471	0.294118	0.294118	0.235294			17.6471	29.4118	29.4118	23.5294			0.1774	0.298532	0.298532	0.237521
	4	4	7	8	23	23		0.173913	0.173913	0.304348	0.347826			17.3913	17.3913	30.4348	34.7826			0.174802	0.174802	0.309254	0.355251
	8	6	9	5	28	28		0.285714	0.214286	0.321429	0.178571			28.5714	21.4286	32.1429	17.8571			0.289752	0.21596	0.327238	0.179534
	6	9	9	7	31	31		0.193548	0.290323	0.290323	0.225806			19.3548	29.0323	29.0323	22.5806			0.194778	0.294564	0.294564	0.227771
	11	10	12	6	39	39		0.282051	0.25641	0.307692	0.153846			28.2051	25.641	30.7692	15.3846			0.285932	0.259306	0.312767	0.15446
	8	11	9	10	38	38		0.210526	0.289474	0.236842	0.263158			21.0526	28.9474	23.6842	26.3158			0.212113	0.293677	0.239114	0.266294
	6	8	8	6	28	28		0.214286	0.285714	0.285714	0.214286			21.4286	28.5714	28.5714	21.4286			0.21596	0.289752	0.289752	0.21596
	2	3	6	6	17	17		0.117647	0.176471	0.352941	0.352941			11.7647	17.6471	35.2941	35.2941			0.11792	0.1774	0.360713	0.360713
	4	5	8	9	26	26		0.153846	0.192308	0.307692	0.346154			15.3846	19.2308	30.7692	34.6154			0.15446	0.193513	0.312767	0.353468
	4	4	7	4	19	19		0.210526	0.210526	0.368421	0.210526			21.0526	21.0526	36.8421	21.0526			0.212113	0.212113	0.37731	0.212113
	4	4	7	8	23	23		0.173913	0.173913	0.304348	0.347826			17.3913	17.3913	30.4348	34.7826			0.174802	0.174802	0.309254	0.355251
	3	3	6	9	21	21		0.142857	0.142857	0.285714	0.428571			14.2857	14.2857	28.5714	42.8571			0.143348	0.143348	0.289752	0.442911
Plantago 0,2	9	5	2	4	20	20	Plantago 0,2	0.45	0.25	0.1	0.2		Plantago 0,2	45	25	10	20		Plantago 0,2	0.466765	0.25268	0.100167	0.201358
	8	1	0	2	11	11		0.727273	0.0909091	0	0.181818			72.7273	9.09091	0	18.1818			0.81434	0.0910348	0	0.182835
	14	6	0	2	22	22		0.636364	0.272727	0	0.0909091			63.6364	27.2727	0	9.09091			0.689775	0.276227	0	0.0910348
	16	5	3	1	25	25		0.64	0.2	0.12	0.04			64	20	12	4			0.694498	0.201358	0.12029	0.0400107
	8	6	6	4	24	24		0.333333	0.25	0.25	0.166667			33.3333	25	25	16.6667			0.339837	0.25268	0.25268	0.167448
	15	7	2	0	24	24		0.625	0.291667	0.0833333	0			62.5	29.1667	8.33333	0			0.675132	0.295969	0.0834301	0
	8	8	6	0	22	22		0.363636	0.363636	0.272727	0			36.3636	36.3636	27.2727	0			0.372169	0.372169	0.276227	0
	15	12	8	4	39	39		0.384615	0.307692	0.205128	0.102564			38.4615	30.7692	20.5128	10.2564			0.394791	0.312767	0.206595	0.102745
	16	0	4	2	22	22		0.727273	0	0.181818	0.0909091			72.7273	0	18.1818	9.09091			0.81434	0	0.182835	0.0910348
	8	4	8	4	24	24		0.333333	0.166667	0.333333	0.166667			33.3333	16.6667	33.3333	16.6667			0.339837	0.167448	0.339837	0.167448
	20	5	7	3	35	35		0.571429	0.142857	0.2	0.0857143			57.1429	14.2857	20	8.57143			0.608246	0.143348	0.201358	0.0858196
	24	3	1	0	28	28		0.857143	0.107143	0.0357143	0			85.7143	10.7143	3.57143	0			1.0297	0.107349	0.0357219	0
	14	14	6	0	34	34		0.411765	0.411765	0.176471	0			41.1765	41.1765	17.6471	0			0.42439	0.42439	0.1774	0
	13	4	1	0	18	18		0.722222	0.222222	0.0555556	0			72.2222	22.2222	5.55556	0			0.80701	0.224093	0.0555842	0
	8	5	4	5	22	22		0.363636	0.227273	0.181818	0.227273			36.3636	22.7273	18.1818	22.7273			0.372169	0.229276	0.182835	0.229276
	8	5	2	1	16	16		0.5	0.3125	0.125	0.0625			50	31.25	12.5	6.25			0.523599	0.317824	0.125328	0.0625408
Plantago 0,4	4	4	8	4	20	20	Plantago 0,4	0.2	0.2	0.4	0.2		Plantago 0,4	20	20	40	20		Plantago 0,4	0.201358	0.201358	0.411517	0.201358
	8	6	2	3	19	19		0.421053	0.315789	0.105263	0.157895			42.1053	31.5789	10.5263	15.7895			0.434606	0.321289	0.105459	0.158558
	2	3	5	0	10	10		0.2	0.3	0.5	0			20	30	50	0			0.201358	0.304693	0.523599	0
	8	5	2	2	17	17		0.470588	0.294118	0.117647	0.117647			47.0588	29.4118	11.7647	11.7647			0.489957	0.298532	0.11792	0.11792
	12	4	2	5	23	23		0.521739	0.173913	0.0869565	0.217391			52.1739	17.3913	8.69565	21.7391			0.548888	0.174802	0.0870665	0.219141
	9	11	1	0	21	21		0.428571	0.52381	0.047619	0			42.8571	52.381	4.7619	0			0.442911	0.551317	0.0476371	0
	20	5	1	0	26	26		0.769231	0.192308	0.0384615	0			76.9231	19.2308	3.84615	0			0.877636	0.193513	0.038471	0
	18	8	6	0	32	32		0.5625	0.25	0.1875	0			56.25	25	18.75	0			0.597406	0.25268	0.188616	0
	20	3	6	0	29	29		0.689655	0.103448	0.206897	0			68.9655	10.3448	20.6897	0			0.761013	0.103634	0.208402	0
	22	4	4	1	31	31		0.709677	0.129032	0.129032	0.0322581			70.9677	12.9032	12.9032	3.22581			0.78904	0.129393	0.129393	0.0322637
	12	4	2	2	20	20		0.6	0.2	0.1	0.1			60	20	10	10			0.643501	0.201358	0.100167	0.100167
	14	6	5	3	28	28		0.5	0.214286	0.178571	0.107143			50	21.4286	17.8571	10.7143			0.523599	0.21596	0.179534	0.107349
	4	3	5	0	12	12		0.333333	0.25	0.416667	0			33.3333	25	41.6667	0			0.339837	0.25268	0.429775	0
	8	8	2	2	20	20		0.4	0.4	0.1	0.1			40	40	10	10			0.411517	0.411517	0.100167	0.100167
	5	9	0	1	15	15		0.333333	0.6	0	0.0666667			33.3333	60	0	6.66667			0.339837	0.643501	0	0.0667161
	6	7	3	2	18	18		0.333333	0.388889	0.166667	0.111111			33.3333	38.8889	16.6667	11.1111			0.339837	0.399425	0.167448	0.111341
Plantago 0,6	7	8	3	1	19	19	Plantago 0,6	0.368421	0.421053	0.157895	0.0526316		Plantago 0,6	36.8421	42.1053	15.7895	5.26316		Plantago 0,6	0.37731	0.434606	0.158558	0.0526559
	23	1	4	2	30	30		0.766667	0.0333333	0.133333	0.0666667			76.6667	3.33333	13.3333	6.66667			0.873633	0.0333395	0.133732	0.0667161
	13	2	3	0	18	18		0.722222	0.111111	0.166667	0			72.2222	11.1111	16.6667	0			0.80701	0.111341	0.167448	0
	28	3	1	0	32	32		0.875	0.09375	0.03125	0			87.5	9.375	3.125	0			1.06544	0.0938879	0.0312551	0
	13	3	5	0	21	21		0.619048	0.142857	0.238095	0			61.9048	14.2857	23.8095	0			0.667529	0.143348	0.240404	0
	7	3	5	0	15	15		0.466667	0.2	0.333333	0			46.6667	20	33.3333	0			0.485518	0.201358	0.339837	0
	13	0	1	0	14	14		0.928571	0	0.0714286	0			92.8571	0	7.14286	0			1.19055	0	0.0714894	0
	11	4	2	0	17	17		0.647059	0.235294	0.117647	0			64.7059	23.5294	11.7647	0			0.703721	0.237521	0.11792	0
	12	10	9	4	35	35		0.342857	0.285714	0.257143	0.114286			34.2857	28.5714	25.7143	11.4286			0.349957	0.289752	0.260064	0.114536
	9	2	6	5	22	22		0.409091	0.0909091	0.272727	0.227273			40.9091	9.09091	27.2727	22.7273			0.421458	0.0910348	0.276227	0.229276
	9	10	6	5	30	30		0.3	0.333333	0.2	0.166667			30	33.3333	20	16.6667			0.304693	0.339837	0.201358	0.167448
	9	6	0	0	15	15		0.6	0.4	0	0			60	40	0	0			0.643501	0.411517	0	0
	23	10	4	5	42	42		0.547619	0.238095	0.0952381	0.119048			54.7619	23.8095	9.52381	11.9048			0.579516	0.240404	0.0953827	0.119331
	18	4	2	0	24	24		0.75	0.166667	0.0833333	0			75	16.6667	8.33333	0			0.848062	0.167448	0.0834301	0
	8	8	2	2	20	20		0.4	0.4	0.1	0.1			40	40	10	10			0.411517	0.411517	0.100167	0.100167
	22	8	4	3	37	37		0.594595	0.216216	0.108108	0.0810811			59.4595	21.6216	10.8108	8.10811			0.636761	0.217937	0.10832	0.0811702
Plantago 0,8	16	1	3	2	22	22	Plantago 0,8	0.727273	0.0454545	0.136364	0.0909091		Plantago 0,8	72.7273	4.54545	13.6364	9.09091		Plantago 0,8	0.81434	0.0454702	0.13679	0.0910348
	14	1	3	0	18	18		0.777778	0.0555556	0.166667	0			77.7778	5.55556	16.6667	0			0.891123	0.0555842	0.167448	0
	10	0	3	3	16	16		0.625	0	0.1875	0.1875			62.5	0	18.75	18.75			0.675132	0	0.188616	0.188616
	13	7	6	2	28	28		0.464286	0.25	0.214286	0.0714286			46.4286	25	21.4286	7.14286			0.482828	0.25268	0.21596	0.0714894
	16	6	9	2	33	33		0.484848	0.181818	0.272727	0.0606061			48.4848	18.1818	27.2727	6.06061			0.50619	0.182835	0.276227	0.0606432
	7	4	10	4	25	25		0.28	0.16	0.4	0.16			28	16	40	16			0.283794	0.160691	0.411517	0.160691
	18	5	3	0	26	26		0.692308	0.192308	0.115385	0			69.2308	19.2308	11.5385	0			0.764682	0.193513	0.115642	0
	8	6	5	1	20	20		0.4	0.3	0.25	0.05			40	30	25	5			0.411517	0.304693	0.25268	0.0500209
	7	4	4	1	16	16		0.4375	0.25	0.25	0.0625			43.75	25	25	6.25			0.452817	0.25268	0.25268	0.0625408
	12	5	8	4	29	29		0.413793	0.172414	0.275862	0.137931			41.3793	17.2414	27.5862	13.7931			0.426617	0.17328	0.279486	0.138372
	15	6	7	4	32	32		0.46875	0.1875	0.21875	0.125			46.875	18.75	21.875	12.5			0.487875	0.188616	0.220533	0.125328
	11	3	2	1	17	17		0.647059	0.176471	0.117647	0.0588235			64.7059	17.6471	11.7647	5.88235			0.703721	0.1774	0.11792	0.0588575
	7	10	1	0	18	18		0.388889	0.555556	0.0555556	0			38.8889	55.5556	5.55556	0			0.399425	0.589031	0.0555842	0
	4	3	2	0	9	9		0.444444	0.333333	0.222222	0			44.4444	33.3333	22.2222	0			0.460554	0.339837	0.224093	0
	16	10	4	0	30	30		0.533333	0.333333	0.133333	0			53.3333	33.3333	13.3333	0			0.562536	0.339837	0.133732	0
	8	7	4	2	21	21		0.380952	0.333333	0.190476	0.0952381			38.0952	33.3333	19.0476	9.52381			0.390826	0.339837	0.191647	0.0953827
Plantago 1,0	18	7	3	1	29	29	Plantago 1,0	0.62069	0.241379	0.103448	0.0344828		Plantago 1,0	62.069	24.1379	10.3448	3.44828		Plantago 1,0	0.669622	0.243787	0.103634	0.0344896
	12	8	3	1	24	24		0.5	0.333333	0.125	0.0416667			50	33.3333	12.5	4.16667			0.523599	0.339837	0.125328	0.0416787
	17	4	3	3	27	27		0.62963	0.148148	0.111111	0.111111			62.963	14.8148	11.1111	11.1111			0.681076	0.148695	0.111341	0.111341
	20	6	2	0	28	28		0.714286	0.214286	0.0714286	0			71.4286	21.4286	7.14286	0			0.795603	0.21596	0.0714894	0
	20	0	1	0	21	21		0.952381	0	0.047619	0			95.2381	0	4.7619	0			1.26095	0	0.0476371	0
	17	4	5	0	26	26		0.653846	0.153846	0.192308	0			65.3846	15.3846	19.2308	0			0.712657	0.15446	0.193513	0
	12	0	6	4	22	22		0.545455	0	0.272727	0.181818			54.5455	0	27.2727	18.1818			0.576931	0	0.276227	0.182835
	23	11	0	1	35	35		0.657143	0.314286	0	0.0285714			65.7143	31.4286	0	2.85714			0.717022	0.319704	0	0.0285753
	7	5	2	0	14	14		0.5	0.357143	0.142857	0			50	35.7143	14.2857	0			0.523599	0.365207	0.143348	0
	5	3	7	5	20	20		0.25	0.15	0.35	0.25			25	15	35	25			0.25268	0.150568	0.357571	0.25268
	15	9	2	0	26	26		0.576923	0.346154	0.0769231	0			57.6923	34.6154	7.69231	0			0.614957	0.353468	0.0769991	0
	8	4	4	2	18	18		0.444444	0.222222	0.222222	0.111111			44.4444	22.2222	22.2222	11.1111			0.460554	0.224093	0.224093	0.111341
	10	7	3	2	22	22		0.454545	0.318182	0.136364	0.0909091			45.4545	31.8182	13.6364	9.09091			0.471862	0.323811	0.13679	0.0910348
	2	9	2	0	13	13		0.153846	0.692308	0.153846	0			15.3846	69.2308	15.3846	0			0.15446	0.764682	0.15446	0
	4	9	4	0	17	17		0.235294	0.529412	0.235294	0			23.5294	52.9412	23.5294	0			0.237521	0.557907	0.237521	0
	19	5	4	2	30	30		0.633333	0.166667	0.133333	0.0666667			63.3333	16.6667	13.3333	6.66667			0.685853	0.167448	0.133732	0.0667161
Plantago 1,2	15	4	4	0	23	23	Plantago 1,2	0.652174	0.173913	0.173913	0		Plantago 1,2	65.2174	17.3913	17.3913	0		Plantago 1,2	0.710449	0.174802	0.174802	0
	6	6	1	0	13	13		0.461538	0.461538	0.0769231	0			46.1538	46.1538	7.69231	0			0.479729	0.479729	0.0769991	0
	7	6	0	2	15	15		0.466667	0.4	0	0.133333			46.6667	40	0	13.3333			0.485518	0.411517	0	0.133732
	21	6	3	2	32	32		0.65625	0.1875	0.09375	0.0625			65.625	18.75	9.375	6.25			0.715838	0.188616	0.0938879	0.0625408
	26	4	4	6	40	40		0.65	0.1	0.1	0.15			65	10	10	15			0.707584	0.100167	0.100167	0.150568
	11	4	2	3	20	20		0.55	0.2	0.1	0.15			55	20	10	15			0.582364	0.201358	0.100167	0.150568
	12	3	0	0	15	15		0.8	0.2	0	0			80	20	0	0			0.927295	0.201358	0	0
	11	6	2	3	22	22		0.5	0.272727	0.0909091	0.136364			50	27.2727	9.09091	13.6364			0.523599	0.276227	0.0910348	0.13679
	5	4	2	1	12	12		0.416667	0.333333	0.166667	0.0833333			41.6667	33.3333	16.6667	8.33333			0.429775	0.339837	0.167448	0.0834301
	10	5	1	1	17	17		0.588235	0.294118	0.0588235	0.0588235			58.8235	29.4118	5.88235	5.88235			0.628875	0.298532	0.0588575	0.0588575
	7	3	7	3	20	20		0.35	0.15	0.35	0.15			35	15	35	15			0.357571	0.150568	0.357571	0.150568
	2	8	2	4	16	16		0.125	0.5	0.125	0.25			12.5	50	12.5	25			0.125328	0.523599	0.125328	0.25268
	7	6	5	2	20	20		0.35	0.3	0.25	0.1			35	30	25	10			0.357571	0.304693	0.25268	0.100167
	8	5	4	1	18	18		0.444444	0.277778	0.222222	0.0555556			44.4444	27.7778	22.2222	5.55556			0.460554	0.28148	0.224093	0.0555842
	1	6	4	2	13	13		0.0769231	0.461538	0.307692	0.153846			7.69231	46.1538	30.7692	15.3846			0.0769991	0.479729	0.312767	0.15446
	6	5	3	4	18	18		0.333333	0.277778	0.166667	0.222222			33.3333	27.7778	16.6667	22.2222			0.339837	0.28148	0.167448	0.224093
Plantago 1,4	15	12	3	2	32	32	Plantago 1,4	0.46875	0.375	0.09375	0.0625		Plantago 1,4	46.875	37.5	9.375	6.25		Plantago 1,4	0.487875	0.384397	0.0938879	0.0625408
	13	14	2	1	30	30		0.433333	0.466667	0.0666667	0.0333333			43.3333	46.6667	6.66667	3.33333			0.448188	0.485518	0.0667161	0.0333395
	10	9	7	1	27	27		0.37037	0.333333	0.259259	0.037037			37.037	33.3333	25.9259	3.7037			0.379408	0.339837	0.262255	0.0370455
	10	9	1	0	20	20		0.5	0.45	0.05	0			50	45	5	0			0.523599	0.466765	0.0500209	0
	16	7	6	1	30	30		0.533333	0.233333	0.2	0.0333333			53.3333	23.3333	20	3.33333			0.562536	0.235504	0.201358	0.0333395
	15	6	2	1	24	24		0.625	0.25	0.0833333	0.0416667			62.5	25	8.33333	4.16667			0.675132	0.25268	0.0834301	0.0416787
	8	5	3	0	16	16		0.5	0.3125	0.1875	0			50	31.25	18.75	0			0.523599	0.317824	0.188616	0
	8	2	4	0	14	14		0.571429	0.142857	0.285714	0			57.1429	14.2857	28.5714	0			0.608246	0.143348	0.289752	0
	11	5	6	3	25	25		0.44	0.2	0.24	0.12			44	20	24	12			0.455599	0.201358	0.242366	0.12029
	6	5	4	1	16	16		0.375	0.3125	0.25	0.0625			37.5	31.25	25	6.25			0.384397	0.317824	0.25268	0.0625408
	13	7	4	2	26	26		0.5	0.269231	0.153846	0.0769231			50	26.9231	15.3846	7.69231			0.523599	0.272594	0.15446	0.0769991
	10	8	1	5	24	24		0.416667	0.333333	0.0416667	0.208333			41.6667	33.3333	4.16667	20.8333			0.429775	0.339837	0.0416787	0.209871
	9	10	2	1	22	22		0.409091	0.454545	0.0909091	0.0454545			40.9091	45.4545	9.09091	4.54545			0.421458	0.471862	0.0910348	0.0454702
	11	8	3	2	24	24		0.458333	0.333333	0.125	0.0833333			45.8333	33.3333	12.5	8.33333			0.476119	0.339837	0.125328	0.0834301
	14	6	3	2	25	25		0.56	0.24	0.12	0.08			56	24	12	8			0.594386	0.242366	0.12029	0.0800856
	6	4	2	1	13	13		0.461538	0.307692	0.153846	0.0769231			46.1538	30.7692	15.3846	7.69231			0.479729	0.312767	0.15446	0.0769991
Plantago 1,6	7	4	4	4	19	19	Plantago 1,6	0.368421	0.210526	0.210526	0.210526		Plantago 1,6	36.8421	21.0526	21.0526	21.0526		Plantago 1,6	0.37731	0.212113	0.212113	0.212113
	1	0	2	10	13	13		0.0769231	0	0.153846	0.769231			7.69231	0	15.3846	76.9231			0.0769991	0	0.15446	0.877636
	14	6	7	5	32	32		0.4375	0.1875	0.21875	0.15625			43.75	18.75	21.875	15.625			0.452817	0.188616	0.220533	0.156893
	6	5	2	7	20	20		0.3	0.25	0.1	0.35			30	25	10	35			0.304693	0.25268	0.100167	0.357571
	19	4	5	2	30	30		0.633333	0.133333	0.166667	0.0666667			63.3333	13.3333	16.6667	6.66667			0.685853	0.133732	0.167448	0.0667161
	15	9	1	4	29	29		0.517241	0.310345	0.0344828	0.137931			51.7241	31.0345	3.44828	13.7931			0.543625	0.315556	0.0344896	0.138372
	15	5	4	3	27	27		0.555556	0.185185	0.148148	0.111111			55.5556	18.5185	14.8148	11.1111			0.589031	0.18626	0.148695	0.111341
	7	1	4	1	13	13		0.538462	0.0769231	0.307692	0.0769231			53.8462	7.69231	30.7692	7.69231			0.56861	0.0769991	0.312767	0.0769991
	11	6	11	5	33	33		0.333333	0.181818	0.333333	0.151515			33.3333	18.1818	33.3333	15.1515			0.339837	0.182835	0.339837	0.152101
	11	3	6	1	21	21		0.52381	0.142857	0.285714	0.047619			52.381	14.2857	28.5714	4.7619			0.551317	0.143348	0.289752	0.0476371
	13	10	2	7	32	32		0.40625	0.3125	0.0625	0.21875			40.625	31.25	6.25	21.875			0.418346	0.317824	0.0625408	0.220533
	10	9	6	7	32	32		0.3125	0.28125	0.1875	0.21875			31.25	28.125	18.75	21.875			0.317824	0.285096	0.188616	0.220533
	8	2	5	3	18	18		0.444444	0.111111	0.277778	0.166667			44.4444	11.1111	27.7778	16.6667			0.460554	0.111341	0.28148	0.167448
	10	4	3	5	22	22		0.454545	0.181818	0.136364	0.227273			45.4545	18.1818	13.6364	22.7273			0.471862	0.182835	0.13679	0.229276
	13	5	6	5	29	29		0.448276	0.172414	0.206897	0.172414			44.8276	17.2414	20.6897	17.2414			0.464836	0.17328	0.208402	0.17328
	10	16	6	3	35	35		0.285714	0.457143	0.171429	0.0857143			28.5714	45.7143	17.1429	8.57143			0.289752	0.47478	0.17228	0.0858196
Plantago 1,8	10	8	2	4	24	24	Plantago 1,8	0.416667	0.333333	0.0833333	0.166667		Plantago 1,8	41.6667	33.3333	8.33333	16.6667		Plantago 1,8	0.429775	0.339837	0.0834301	0.167448
	6	8	1	2	17	17		0.352941	0.470588	0.0588235	0.117647			35.2941	47.0588	5.88235	11.7647			0.360713	0.489957	0.0588575	0.11792
	10	5	2	3	20	20		0.5	0.25	0.1	0.15			50	25	10	15			0.523599	0.25268	0.100167	0.150568
	10	8	4	0	22	22		0.454545	0.363636	0.181818	0			45.4545	36.3636	18.1818	0			0.471862	0.372169	0.182835	0
	10	3	2	0	15	15		0.666667	0.2	0.133333	0			66.6667	20	13.3333	0			0.729728	0.201358	0.133732	0
	12	6	4	2	24	24		0.5	0.25	0.166667	0.0833333			50	25	16.6667	8.33333			0.523599	0.25268	0.167448	0.0834301
	5	4	1	1	11	11		0.454545	0.363636	0.0909091	0.0909091			45.4545	36.3636	9.09091	9.09091			0.471862	0.372169	0.0910348	0.0910348
	7	4	4	7	22	22		0.318182	0.181818	0.181818	0.318182			31.8182	18.1818	18.1818	31.8182			0.323811	0.182835	0.182835	0.323811
	10	3	10	3	26	26		0.384615	0.115385	0.384615	0.115385			38.4615	11.5385	38.4615	11.5385			0.394791	0.115642	0.394791	0.115642
	10	5	5	1	21	21		0.47619	0.238095	0.238095	0.047619			47.619	23.8095	23.8095	4.7619			0.496317	0.240404	0.240404	0.0476371
	11	6	7	2	26	26		0.423077	0.230769	0.269231	0.0769231			42.3077	23.0769	26.9231	7.69231			0.436838	0.232868	0.272594	0.0769991
	11	8	9	3	31	31		0.354839	0.258065	0.290323	0.0967742			35.4839	25.8065	29.0323	9.67742			0.362742	0.261018	0.294564	0.0969259
	10	3	1	0	14	14		0.714286	0.214286	0.0714286	0			71.4286	21.4286	7.14286	0			0.795603	0.21596	0.0714894	0
	7	2	4	2	15	15		0.466667	0.133333	0.266667	0.133333			46.6667	13.3333	26.6667	13.3333			0.485518	0.133732	0.269933	0.133732
	5	4	2	2	13	13		0.384615	0.307692	0.153846	0.153846			38.4615	30.7692	15.3846	15.3846			0.394791	0.312767	0.15446	0.15446
	12	6	3	2	23	23		0.521739	0.26087	0.130435	0.0869565			52.1739	26.087	13.0435	8.69565			0.548888	0.263923	0.130807	0.0870665
Plantago 2,0	12	9	2	2	25	25	Plantago 2,0	0.48	0.36	0.08	0.08		Plantago 2,0	48	36	8	8		Plantago 2,0	0.500655	0.368268	0.0800856	0.0800856
	7	11	1	2	21	21		0.333333	0.52381	0.047619	0.0952381			33.3333	52.381	4.7619	9.52381			0.339837	0.551317	0.0476371	0.0953827
	11	3	4	2	20	20		0.55	0.15	0.2	0.1			55	15	20	10			0.582364	0.150568	0.201358	0.100167
	19	3	1	1	24	24		0.791667	0.125	0.0416667	0.0416667			79.1667	12.5	4.16667	4.16667			0.913532	0.125328	0.0416787	0.0416787
	17	6	1	2	26	26		0.653846	0.230769	0.0384615	0.0769231			65.3846	23.0769	3.84615	7.69231			0.712657	0.232868	0.038471	0.0769991
	10	7	1	0	18	18		0.555556	0.388889	0.0555556	0			55.5556	38.8889	5.55556	0			0.589031	0.399425	0.0555842	0
	8	5	5	3	21	21		0.380952	0.238095	0.238095	0.142857			38.0952	23.8095	23.8095	14.2857			0.390826	0.240404	0.240404	0.143348
	16	4	2	2	24	24		0.666667	0.166667	0.0833333	0.0833333			66.6667	16.6667	8.33333	8.33333			0.729728	0.167448	0.0834301	0.0834301
	15	9	2	1	27	27		0.555556	0.333333	0.0740741	0.037037			55.5556	33.3333	7.40741	3.7037			0.589031	0.339837	0.074142	0.0370455
	9	11	3	1	24	24		0.375	0.458333	0.125	0.0416667			37.5	45.8333	12.5	4.16667			0.384397	0.476119	0.125328	0.0416787
	9	4	3	2	18	18		0.5	0.222222	0.166667	0.111111			50	22.2222	16.6667	11.1111			0.523599	0.224093	0.167448	0.111341
	16	12	4	2	34	34		0.470588	0.352941	0.117647	0.0588235			47.0588	35.2941	11.7647	5.88235			0.489957	0.360713	0.11792	0.0588575
	7	5	3	3	18	18		0.388889	0.277778	0.166667	0.166667			38.8889	27.7778	16.6667	16.6667			0.399425	0.28148	0.167448	0.167448
	9	6	3	2	20	20		0.45	0.3	0.15	0.1			45	30	15	10			0.466765	0.304693	0.150568	0.100167
	9	6	2	2	19	19		0.473684	0.315789	0.105263	0.105263			47.3684	31.5789	10.5263	10.5263			0.493469	0.321289	0.105459	0.105459
	10	7	4	1	22	22		0.454545	0.318182	0.181818	0.0454545			45.4545	31.8182	18.1818	4.54545			0.471862	0.323811	0.182835	0.0454702

## Sheet: 24 hour
	None	Weak	Middle	Strong	Total		%	None	Weak	Middle	Strong		%	None	Weak	Middle	Strong		Arcsin	None	Weak	Middle	Strong			None	Weak	Middle	Strong
Untreated	3	1	2	5	11		Untreated	0.272727	0.0909091	0.181818	0.454545		Untreated	27.2727	9.09091	18.1818	45.4545		Untreated	0.276227	0.0910348	0.182835	0.471862		Untreated	19.6578	14.7536	26.3922	39.1965
	8	1	4	4	17			0.470588	0.0588235	0.235294	0.235294			47.0588	5.88235	23.5294	23.5294			0.489957	0.0588575	0.237521	0.237521		PBS	19.6988	15.1984	27.6821	37.4206
	6	3	3	8	20			0.3	0.15	0.15	0.4			30	15	15	40			0.304693	0.150568	0.150568	0.411517		Plantago 0,2	9.12371	32.1229	25.4695	33.2839
	4	3	3	7	17			0.235294	0.176471	0.176471	0.411765			23.5294	17.6471	17.6471	41.1765			0.237521	0.1774	0.1774	0.42439		Plantago 0,4	7.97402	32.6619	35.0943	24.2698
	3	2	4	7	16			0.1875	0.125	0.25	0.4375			18.75	12.5	25	43.75			0.188616	0.125328	0.25268	0.452817		Plantago 0,6	7.2375	35.5174	24.4361	32.809
	2	3	6	8	19			0.105263	0.157895	0.315789	0.421053			10.5263	15.7895	31.5789	42.1053			0.105459	0.158558	0.321289	0.434606		Plantago 0,8	7.85785	33.0568	22.2462	36.8392
	4	3	6	8	21			0.190476	0.142857	0.285714	0.380952			19.0476	14.2857	28.5714	38.0952			0.191647	0.143348	0.289752	0.390826		Plantago 1,0	8.45354	37.048	22.4857	32.0128
	2	5	8	3	18			0.111111	0.277778	0.444444	0.166667			11.1111	27.7778	44.4444	16.6667			0.111341	0.28148	0.460554	0.167448		Plantago 1,2	9.88826	22.7637	30.1682	37.1799
	3	3	6	10	22			0.136364	0.136364	0.272727	0.454545			13.6364	13.6364	27.2727	45.4545			0.13679	0.13679	0.276227	0.471862		Plantago 1,4	9.01566	22.6096	27.1418	41.233
	8	3	4	3	18			0.444444	0.166667	0.222222	0.166667			44.4444	16.6667	22.2222	16.6667			0.460554	0.167448	0.224093	0.167448		Plantago 1,6	8.78058	27.6089	28.1501	35.4605
	0	3	6	6	15			0	0.2	0.4	0.4			0	20	40	40			0	0.201358	0.411517	0.411517		Plantago 1,8	8.8449	33.6931	31.4599	26.0022
	5	2	5	9	21			0.238095	0.0952381	0.238095	0.428571			23.8095	9.52381	23.8095	42.8571			0.240404	0.0953827	0.240404	0.442911		Plantago 2,0	7.59684	31.7867	29.7863	30.8302
	4	3	5	7	19			0.210526	0.157895	0.263158	0.368421			21.0526	15.7895	26.3158	36.8421			0.212113	0.158558	0.266294	0.37731
	1	1	3	5	10			0.1	0.1	0.3	0.5			10	10	30	50			0.100167	0.100167	0.304693	0.523599
	0	2	3	6	11			0	0.181818	0.272727	0.545455			0	18.1818	27.2727	54.5455			0	0.182835	0.276227	0.576931
	2	2	3	7	14			0.142857	0.142857	0.214286	0.5			14.2857	14.2857	21.4286	50			0.143348	0.143348	0.21596	0.523599
PBS	3	8	3	1	15		PBS	0.2	0.533333	0.2	0.0666667		PBS	20	53.3333	20	6.66667		PBS	0.201358	0.562536	0.201358	0.0667161
	3	5	4	7	19			0.157895	0.263158	0.210526	0.368421			15.7895	26.3158	21.0526	36.8421			0.158558	0.266294	0.212113	0.37731
	7	2	4	6	19			0.368421	0.105263	0.210526	0.315789			36.8421	10.5263	21.0526	31.5789			0.37731	0.105459	0.212113	0.321289
	6	3	9	8	26			0.230769	0.115385	0.346154	0.307692			23.0769	11.5385	34.6154	30.7692			0.232868	0.115642	0.353468	0.312767
	4	2	5	5	16			0.25	0.125	0.3125	0.3125			25	12.5	31.25	31.25			0.25268	0.125328	0.317824	0.317824
	3	2	3	6	14			0.214286	0.142857	0.214286	0.428571			21.4286	14.2857	21.4286	42.8571			0.21596	0.143348	0.21596	0.442911
	3	2	7	6	18			0.166667	0.111111	0.388889	0.333333			16.6667	11.1111	38.8889	33.3333			0.167448	0.111341	0.399425	0.339837
	4	2	3	5	14			0.285714	0.142857	0.214286	0.357143			28.5714	14.2857	21.4286	35.7143			0.289752	0.143348	0.21596	0.365207
	2	2	8	6	18			0.111111	0.111111	0.444444	0.333333			11.1111	11.1111	44.4444	33.3333			0.111341	0.111341	0.460554	0.339837
	3	2	7	10	22			0.136364	0.0909091	0.318182	0.454545			13.6364	9.09091	31.8182	45.4545			0.13679	0.0910348	0.323811	0.471862
	5	4	9	15	33			0.151515	0.121212	0.272727	0.454545			15.1515	12.1212	27.2727	45.4545			0.152101	0.121511	0.276227	0.471862
	8	3	6	13	30			0.266667	0.1	0.2	0.433333			26.6667	10	20	43.3333			0.269933	0.100167	0.201358	0.448188
	6	4	9	9	28			0.214286	0.142857	0.321429	0.321429			21.4286	14.2857	32.1429	32.1429			0.21596	0.143348	0.327238	0.327238
	3	3	4	10	20			0.15	0.15	0.2	0.5			15	15	20	50			0.150568	0.150568	0.201358	0.523599
	4	2	8	14	28			0.142857	0.0714286	0.285714	0.5			14.2857	7.14286	28.5714	50			0.143348	0.0714894	0.289752	0.523599
	4	4	11	19	38			0.105263	0.105263	0.289474	0.5			10.5263	10.5263	28.9474	50			0.105459	0.105459	0.293677	0.523599
Plantago 0,2	2	8	10	7	27		Plantago 0,2	0.0740741	0.296296	0.37037	0.259259		Plantago 0,2	7.40741	29.6296	37.037	25.9259		Plantago 0,2	0.074142	0.300812	0.379408	0.262255
	1	6	4	13	24			0.0416667	0.25	0.166667	0.541667			4.16667	25	16.6667	54.1667			0.0416787	0.25268	0.167448	0.572419
	3	3	9	11	26			0.115385	0.115385	0.346154	0.423077			11.5385	11.5385	34.6154	42.3077			0.115642	0.115642	0.353468	0.436838
	2	6	6	4	18			0.111111	0.333333	0.333333	0.222222			11.1111	33.3333	33.3333	22.2222			0.111341	0.339837	0.339837	0.224093
	3	7	6	9	25			0.12	0.28	0.24	0.36			12	28	24	36			0.12029	0.283794	0.242366	0.368268
	2	8	5	10	25			0.08	0.32	0.2	0.4			8	32	20	40			0.0800856	0.325729	0.201358	0.411517
	2	6	5	5	18			0.111111	0.333333	0.277778	0.277778			11.1111	33.3333	27.7778	27.7778			0.111341	0.339837	0.28148	0.28148
	1	5	4	5	15			0.0666667	0.333333	0.266667	0.333333			6.66667	33.3333	26.6667	33.3333			0.0667161	0.339837	0.269933	0.339837
	2	4	3	6	15			0.133333	0.266667	0.2	0.4			13.3333	26.6667	20	40			0.133732	0.269933	0.201358	0.411517
	2	9	7	6	24			0.0833333	0.375	0.291667	0.25			8.33333	37.5	29.1667	25			0.0834301	0.384397	0.295969	0.25268
	4	10	9	8	31			0.129032	0.322581	0.290323	0.258065			12.9032	32.2581	29.0323	25.8065			0.129393	0.328455	0.294564	0.261018
	2	7	3	4	16			0.125	0.4375	0.1875	0.25			12.5	43.75	18.75	25			0.125328	0.452817	0.188616	0.25268
	1	2	3	7	13			0.0769231	0.153846	0.230769	0.538462			7.69231	15.3846	23.0769	53.8462			0.0769991	0.15446	0.232868	0.56861
	1	9	4	3	17			0.0588235	0.529412	0.235294	0.176471			5.88235	52.9412	23.5294	17.6471			0.0588575	0.557907	0.237521	0.1774
	0	10	2	7	19			0	0.526316	0.105263	0.368421			0	52.6316	10.5263	36.8421			0	0.554262	0.105459	0.37731
	2	4	5	4	15			0.133333	0.266667	0.333333	0.266667			13.3333	26.6667	33.3333	26.6667			0.133732	0.269933	0.339837	0.269933
Plantago 0,4	2	7	5	2	16		Plantago 0,4	0.125	0.4375	0.3125	0.125		Plantago 0,4	12.5	43.75	31.25	12.5		Plantago 0,4	0.125328	0.452817	0.317824	0.125328
	3	5	9	5	22			0.136364	0.227273	0.409091	0.227273			13.6364	22.7273	40.9091	22.7273			0.13679	0.229276	0.421458	0.229276
	1	7	3	1	12			0.0833333	0.583333	0.25	0.0833333			8.33333	58.3333	25	8.33333			0.0834301	0.622827	0.25268	0.0834301
	1	3	8	4	16			0.0625	0.1875	0.5	0.25			6.25	18.75	50	25			0.0625408	0.188616	0.523599	0.25268
	2	9	8	2	21			0.0952381	0.428571	0.380952	0.0952381			9.52381	42.8571	38.0952	9.52381			0.0953827	0.442911	0.390826	0.0953827
	2	8	11	0	21			0.0952381	0.380952	0.52381	0			9.52381	38.0952	52.381	0			0.0953827	0.390826	0.551317	0
	3	11	9	0	23			0.130435	0.478261	0.391304	0			13.0435	47.8261	39.1304	0			0.130807	0.498673	0.402049	0
	4	10	9	1	24			0.166667	0.416667	0.375	0.0416667			16.6667	41.6667	37.5	4.16667			0.167448	0.429775	0.384397	0.0416787
	3	6	10	4	23			0.130435	0.26087	0.434783	0.173913			13.0435	26.087	43.4783	17.3913			0.130807	0.263923	0.449797	0.174802
	2	8	6	3	19			0.105263	0.421053	0.315789	0.157895			10.5263	42.1053	31.5789	15.7895			0.105459	0.434606	0.321289	0.158558
	0	2	6	4	12			0	0.166667	0.5	0.333333			0	16.6667	50	33.3333			0	0.167448	0.523599	0.339837
	1	3	7	1	12			0.0833333	0.25	0.583333	0.0833333			8.33333	25	58.3333	8.33333			0.0834301	0.25268	0.622827	0.0834301
	0	0	0	18	18			0	0	0	1			0	0	0	100			0	0	0	1.5708
	0	6	3	17	26			0	0.230769	0.115385	0.653846			0	23.0769	11.5385	65.3846			0	0.232868	0.115642	0.712657
	1	13	4	9	27			0.037037	0.481481	0.148148	0.333333			3.7037	48.1481	14.8148	33.3333			0.0370455	0.502344	0.148695	0.339837
	1	11	15	13	40			0.025	0.275	0.375	0.325			2.5	27.5	37.5	32.5			0.0250026	0.27859	0.384397	0.331012
Plantago 0,6	2	6	6	8	22		Plantago 0,6	0.0909091	0.272727	0.272727	0.363636		Plantago 0,6	9.09091	27.2727	27.2727	36.3636		Plantago 0,6	0.0910348	0.276227	0.276227	0.372169
	0	5	1	12	18			0	0.277778	0.0555556	0.666667			0	27.7778	5.55556	66.6667			0	0.28148	0.0555842	0.729728
	3	11	3	11	28			0.107143	0.392857	0.107143	0.392857			10.7143	39.2857	10.7143	39.2857			0.107349	0.403736	0.107349	0.403736
	2	11	5	16	34			0.0588235	0.323529	0.147059	0.470588			5.88235	32.3529	14.7059	47.0588			0.0588575	0.329457	0.147594	0.489957
	2	9	2	6	19			0.105263	0.473684	0.105263	0.315789			10.5263	47.3684	10.5263	31.5789			0.105459	0.493469	0.105459	0.321289
	0	6	5	5	16			0	0.375	0.3125	0.3125			0	37.5	31.25	31.25			0	0.384397	0.317824	0.317824
	2	0	4	19	25			0.08	0	0.16	0.76			8	0	16	76			0.0800856	0	0.160691	0.863313
	1	9	4	3	17			0.0588235	0.529412	0.235294	0.176471			5.88235	52.9412	23.5294	17.6471			0.0588575	0.557907	0.237521	0.1774
	3	3	3	4	13			0.230769	0.230769	0.230769	0.307692			23.0769	23.0769	23.0769	30.7692			0.232868	0.232868	0.232868	0.312767
	1	6	3	5	15			0.0666667	0.4	0.2	0.333333			6.66667	40	20	33.3333			0.0667161	0.411517	0.201358	0.339837
	2	10	6	7	25			0.08	0.4	0.24	0.28			8	40	24	28			0.0800856	0.411517	0.242366	0.283794
	2	9	8	1	20			0.1	0.45	0.4	0.05			10	45	40	5			0.100167	0.466765	0.411517	0.0500209
	0	7	8	2	17			0	0.411765	0.470588	0.117647			0	41.1765	47.0588	11.7647			0	0.42439	0.489957	0.11792
	2	11	9	6	28			0.0714286	0.392857	0.321429	0.214286			7.14286	39.2857	32.1429	21.4286			0.0714894	0.403736	0.327238	0.21596
	1	13	11	7	32			0.03125	0.40625	0.34375	0.21875			3.125	40.625	34.375	21.875			0.0312551	0.418346	0.350907	0.220533
	2	9	8	7	26			0.0769231	0.346154	0.307692	0.269231			7.69231	34.6154	30.7692	26.9231			0.0769991	0.353468	0.312767	0.272594
Plantago 0,8	1	8	5	5	19		Plantago 0,8	0.0526316	0.421053	0.263158	0.263158		Plantago 0,8	5.26316	42.1053	26.3158	26.3158		Plantago 0,8	0.0526559	0.434606	0.266294	0.266294
	0	5	5	4	14			0	0.357143	0.357143	0.285714			0	35.7143	35.7143	28.5714			0	0.365207	0.365207	0.289752
	0	3	1	6	10			0	0.3	0.1	0.6			0	30	10	60			0	0.304693	0.100167	0.643501
	3	12	9	5	29			0.103448	0.413793	0.310345	0.172414			10.3448	41.3793	31.0345	17.2414			0.103634	0.426617	0.315556	0.17328
	1	10	4	6	21			0.047619	0.47619	0.190476	0.285714			4.7619	47.619	19.0476	28.5714			0.0476371	0.496317	0.191647	0.289752
	2	9	3	7	21			0.0952381	0.428571	0.142857	0.333333			9.52381	42.8571	14.2857	33.3333			0.0953827	0.442911	0.143348	0.339837
	2	6	4	6	18			0.111111	0.333333	0.222222	0.333333			11.1111	33.3333	22.2222	33.3333			0.111341	0.339837	0.224093	0.339837
	3	9	4	4	20			0.15	0.45	0.2	0.2			15	45	20	20			0.150568	0.466765	0.201358	0.201358
	4	8	5	7	24			0.166667	0.333333	0.208333	0.291667			16.6667	33.3333	20.8333	29.1667			0.167448	0.339837	0.209871	0.295969
	1	1	2	10	14			0.0714286	0.0714286	0.142857	0.714286			7.14286	7.14286	14.2857	71.4286			0.0714894	0.0714894	0.143348	0.795603
	1	2	2	12	17			0.0588235	0.117647	0.117647	0.705882			5.88235	11.7647	11.7647	70.5882			0.0588575	0.11792	0.11792	0.783668
	3	4	3	10	20			0.15	0.2	0.15	0.5			15	20	15	50			0.150568	0.201358	0.150568	0.523599
	0	5	3	7	15			0	0.333333	0.2	0.466667			0	33.3333	20	46.6667			0	0.339837	0.201358	0.485518
	2	11	7	3	23			0.0869565	0.478261	0.304348	0.130435			8.69565	47.8261	30.4348	13.0435			0.0870665	0.498673	0.309254	0.130807
	2	9	6	7	24			0.0833333	0.375	0.25	0.291667			8.33333	37.5	25	29.1667			0.0834301	0.384397	0.25268	0.295969
	2	5	10	8	25			0.08	0.2	0.4	0.32			8	20	40	32			0.0800856	0.201358	0.411517	0.325729
Plantago 1,0	2	9	2	4	17		Plantago 1,0	0.117647	0.529412	0.117647	0.235294		Plantago 1,0	11.7647	52.9412	11.7647	23.5294		Plantago 1,0	0.11792	0.557907	0.11792	0.237521
	1	9	4	0	14			0.0714286	0.642857	0.285714	0			7.14286	64.2857	28.5714	0			0.0714894	0.698222	0.289752	0
	3	10	4	2	19			0.157895	0.526316	0.210526	0.105263			15.7895	52.6316	21.0526	10.5263			0.158558	0.554262	0.212113	0.105459
	2	19	6	5	32			0.0625	0.59375	0.1875	0.15625			6.25	59.375	18.75	15.625			0.0625408	0.635711	0.188616	0.156893
	2	3	5	4	14			0.142857	0.214286	0.357143	0.285714			14.2857	21.4286	35.7143	28.5714			0.143348	0.21596	0.365207	0.289752
	2	8	7	5	22			0.0909091	0.363636	0.318182	0.227273			9.09091	36.3636	31.8182	22.7273			0.0910348	0.372169	0.323811	0.229276
	0	8	2	14	24			0	0.333333	0.0833333	0.583333			0	33.3333	8.33333	58.3333			0	0.339837	0.0834301	0.622827
	0	3	2	11	16			0	0.1875	0.125	0.6875			0	18.75	12.5	68.75			0	0.188616	0.125328	0.758041
	3	3	3	9	18			0.166667	0.166667	0.166667	0.5			16.6667	16.6667	16.6667	50			0.167448	0.167448	0.167448	0.523599
	2	14	8	9	33			0.0606061	0.424242	0.242424	0.272727			6.06061	42.4242	24.2424	27.2727			0.0606432	0.438125	0.244864	0.276227
	2	3	2	14	21			0.0952381	0.142857	0.0952381	0.666667			9.52381	14.2857	9.52381	66.6667			0.0953827	0.143348	0.0953827	0.729728
	0	4	9	5	18			0	0.222222	0.5	0.277778			0	22.2222	50	27.7778			0	0.224093	0.523599	0.28148
	3	8	5	8	24			0.125	0.333333	0.208333	0.333333			12.5	33.3333	20.8333	33.3333			0.125328	0.339837	0.209871	0.339837
	2	4	7	9	22			0.0909091	0.181818	0.318182	0.409091			9.09091	18.1818	31.8182	40.9091			0.0910348	0.182835	0.323811	0.421458
	2	13	5	5	25			0.08	0.52	0.2	0.2			8	52	20	20			0.0800856	0.546851	0.201358	0.201358
	1	6	2	2	11			0.0909091	0.545455	0.181818	0.181818			9.09091	54.5455	18.1818	18.1818			0.0910348	0.576931	0.182835	0.182835
Plantago 1,2	2	5	6	4	17		Plantago 1,2	0.117647	0.294118	0.352941	0.235294		Plantago 1,2	11.7647	29.4118	35.2941	23.5294		Plantago 1,2	0.11792	0.298532	0.360713	0.237521
	6	4	7	5	22			0.272727	0.181818	0.318182	0.227273			27.2727	18.1818	31.8182	22.7273			0.276227	0.182835	0.323811	0.229276
	2	11	9	8	30			0.0666667	0.366667	0.3	0.266667			6.66667	36.6667	30	26.6667			0.0667161	0.375424	0.304693	0.269933
	1	2	5	6	14			0.0714286	0.142857	0.357143	0.428571			7.14286	14.2857	35.7143	42.8571			0.0714894	0.143348	0.365207	0.442911
	3	6	10	5	24			0.125	0.25	0.416667	0.208333			12.5	25	41.6667	20.8333			0.125328	0.25268	0.429775	0.209871
	2	4	3	2	11			0.181818	0.363636	0.272727	0.181818			18.1818	36.3636	27.2727	18.1818			0.182835	0.372169	0.276227	0.182835
	4	8	11	10	33			0.121212	0.242424	0.333333	0.30303			12.1212	24.2424	33.3333	30.303			0.121511	0.244864	0.339837	0.307871
	6	8	5	4	23			0.26087	0.347826	0.217391	0.173913			26.087	34.7826	21.7391	17.3913			0.263923	0.355251	0.219141	0.174802
	1	7	5	6	19			0.0526316	0.368421	0.263158	0.315789			5.26316	36.8421	26.3158	31.5789			0.0526559	0.37731	0.266294	0.321289
	1	8	5	6	20			0.05	0.4	0.25	0.3			5	40	25	30			0.0500209	0.411517	0.25268	0.304693
	0	3	6	6	15			0	0.2	0.4	0.4			0	20	40	40			0	0.201358	0.411517	0.411517
	1	3	2	9	15			0.0666667	0.2	0.133333	0.6			6.66667	20	13.3333	60			0.0667161	0.201358	0.133732	0.643501
	3	0	4	13	20			0.15	0	0.2	0.65			15	0	20	65			0.150568	0	0.201358	0.707584
	0	1	4	11	16			0	0.0625	0.25	0.6875			0	6.25	25	68.75			0	0.0625408	0.25268	0.758041
	0	3	6	8	17			0	0.176471	0.352941	0.470588			0	17.6471	35.2941	47.0588			0	0.1774	0.360713	0.489957
	1	1	9	11	22			0.0454545	0.0454545	0.409091	0.5			4.54545	4.54545	40.9091	50			0.0454702	0.0454702	0.421458	0.523599
Plantago 1,4	1	6	6	5	18		Plantago 1,4	0.0555556	0.333333	0.333333	0.277778		Plantago 1,4	5.55556	33.3333	33.3333	27.7778		Plantago 1,4	0.0555842	0.339837	0.339837	0.28148
	2	8	2	3	15			0.133333	0.533333	0.133333	0.2			13.3333	53.3333	13.3333	20			0.133732	0.562536	0.133732	0.201358
	2	2	5	4	13			0.153846	0.153846	0.384615	0.307692			15.3846	15.3846	38.4615	30.7692			0.15446	0.15446	0.394791	0.312767
	2	3	9	4	18			0.111111	0.166667	0.5	0.222222			11.1111	16.6667	50	22.2222			0.111341	0.167448	0.523599	0.224093
	3	3	13	7	26			0.115385	0.115385	0.5	0.269231			11.5385	11.5385	50	26.9231			0.115642	0.115642	0.523599	0.272594
	3	4	3	7	17			0.176471	0.235294	0.176471	0.411765			17.6471	23.5294	17.6471	41.1765			0.1774	0.237521	0.1774	0.42439
	0	3	7	10	20			0	0.15	0.35	0.5			0	15	35	50			0	0.150568	0.357571	0.523599
	0	13	4	6	23			0	0.565217	0.173913	0.26087			0	56.5217	17.3913	26.087			0	0.600697	0.174802	0.263923
	2	4	3	9	18			0.111111	0.222222	0.166667	0.5			11.1111	22.2222	16.6667	50			0.111341	0.224093	0.167448	0.523599
	0	8	6	14	28			0	0.285714	0.214286	0.5			0	28.5714	21.4286	50			0	0.289752	0.21596	0.523599
	2	3	4	13	22			0.0909091	0.136364	0.181818	0.590909			9.09091	13.6364	18.1818	59.0909			0.0910348	0.13679	0.182835	0.632185
	2	1	5	14	22			0.0909091	0.0454545	0.227273	0.636364			9.09091	4.54545	22.7273	63.6364			0.0910348	0.0454702	0.229276	0.689775
	2	0	2	12	16			0.125	0	0.125	0.75			12.5	0	12.5	75			0.125328	0	0.125328	0.848062
	3	12	5	7	27			0.111111	0.444444	0.185185	0.259259			11.1111	44.4444	18.5185	25.9259			0.111341	0.460554	0.18626	0.262255
	1	2	6	7	16			0.0625	0.125	0.375	0.4375			6.25	12.5	37.5	43.75			0.0625408	0.125328	0.384397	0.452817
	2	2	6	9	19			0.105263	0.105263	0.315789	0.473684			10.5263	10.5263	31.5789	47.3684			0.105459	0.105459	0.321289	0.493469
Plantago 1,6	1	12	4	6	23		Plantago 1,6	0.0434783	0.521739	0.173913	0.26087		Plantago 1,6	4.34783	52.1739	17.3913	26.087		Plantago 1,6	0.043492	0.548888	0.174802	0.263923
	1	2	8	5	16			0.0625	0.125	0.5	0.3125			6.25	12.5	50	31.25			0.0625408	0.125328	0.523599	0.317824
	1	7	10	3	21			0.047619	0.333333	0.47619	0.142857			4.7619	33.3333	47.619	14.2857			0.0476371	0.339837	0.496317	0.143348
	3	8	4	4	19			0.157895	0.421053	0.210526	0.210526			15.7895	42.1053	21.0526	21.0526			0.158558	0.434606	0.212113	0.212113
	1	7	4	2	14			0.0714286	0.5	0.285714	0.142857			7.14286	50	28.5714	14.2857			0.0714894	0.523599	0.289752	0.143348
	3	8	9	2	22			0.136364	0.363636	0.409091	0.0909091			13.6364	36.3636	40.9091	9.09091			0.13679	0.372169	0.421458	0.0910348
	3	7	6	3	19			0.157895	0.368421	0.315789	0.157895			15.7895	36.8421	31.5789	15.7895			0.158558	0.37731	0.321289	0.158558
	2	5	6	7	20			0.1	0.25	0.3	0.35			10	25	30	35			0.100167	0.25268	0.304693	0.357571
	1	7	5	8	21			0.047619	0.333333	0.238095	0.380952			4.7619	33.3333	23.8095	38.0952			0.0476371	0.339837	0.240404	0.390826
	2	2	4	10	18			0.111111	0.111111	0.222222	0.555556			11.1111	11.1111	22.2222	55.5556			0.111341	0.111341	0.224093	0.589031
	2	3	4	11	20			0.1	0.15	0.2	0.55			10	15	20	55			0.100167	0.150568	0.201358	0.582364
	1	3	5	17	26			0.0384615	0.115385	0.192308	0.653846			3.84615	11.5385	19.2308	65.3846			0.038471	0.115642	0.193513	0.712657
	1	2	4	11	18			0.0555556	0.111111	0.222222	0.611111			5.55556	11.1111	22.2222	61.1111			0.0555842	0.111341	0.224093	0.657464
	3	5	8	12	28			0.107143	0.178571	0.285714	0.428571			10.7143	17.8571	28.5714	42.8571			0.107349	0.179534	0.289752	0.442911
	2	6	6	13	27			0.0740741	0.222222	0.222222	0.481481			7.40741	22.2222	22.2222	48.1481			0.074142	0.224093	0.224093	0.502344
	3	10	8	11	32			0.09375	0.3125	0.25	0.34375			9.375	31.25	25	34.375			0.0938879	0.317824	0.25268	0.350907
Plantago 1,8	3	5	13	7	28		Plantago 1,8	0.107143	0.178571	0.464286	0.25		Plantago 1,8	10.7143	17.8571	46.4286	25		Plantago 1,8	0.107349	0.179534	0.482828	0.25268
	2	7	5	4	18			0.111111	0.388889	0.277778	0.222222			11.1111	38.8889	27.7778	22.2222			0.111341	0.399425	0.28148	0.224093
	3	3	8	1	15			0.2	0.2	0.533333	0.0666667			20	20	53.3333	6.66667			0.201358	0.201358	0.562536	0.0667161
	2	8	7	9	26			0.0769231	0.307692	0.269231	0.346154			7.69231	30.7692	26.9231	34.6154			0.0769991	0.312767	0.272594	0.353468
	1	1	4	4	10			0.1	0.1	0.4	0.4			10	10	40	40			0.100167	0.100167	0.411517	0.411517
	1	6	1	8	16			0.0625	0.375	0.0625	0.5			6.25	37.5	6.25	50			0.0625408	0.384397	0.0625408	0.523599
	0	7	3	4	14			0	0.5	0.214286	0.285714			0	50	21.4286	28.5714			0	0.523599	0.21596	0.289752
	2	6	5	6	19			0.105263	0.315789	0.263158	0.315789			10.5263	31.5789	26.3158	31.5789			0.105459	0.321289	0.266294	0.321289
	0	8	6	1	15			0	0.533333	0.4	0.0666667			0	53.3333	40	6.66667			0	0.562536	0.411517	0.0667161
	3	9	8	3	23			0.130435	0.391304	0.347826	0.130435			13.0435	39.1304	34.7826	13.0435			0.130807	0.402049	0.355251	0.130807
	1	8	4	6	19			0.0526316	0.421053	0.210526	0.315789			5.26316	42.1053	21.0526	31.5789			0.0526559	0.434606	0.212113	0.321289
	3	11	4	5	23			0.130435	0.478261	0.173913	0.217391			13.0435	47.8261	17.3913	21.7391			0.130807	0.498673	0.174802	0.219141
	3	5	6	3	17			0.176471	0.294118	0.352941	0.176471			17.6471	29.4118	35.2941	17.6471			0.1774	0.298532	0.360713	0.1774
	0	5	3	3	11			0	0.454545	0.272727	0.272727			0	45.4545	27.2727	27.2727			0	0.471862	0.276227	0.276227
	1	3	7	6	17			0.0588235	0.176471	0.411765	0.352941			5.88235	17.6471	41.1765	35.2941			0.0588575	0.1774	0.42439	0.360713
	3	8	11	7	29			0.103448	0.275862	0.37931	0.241379			10.3448	27.5862	37.931	24.1379			0.103634	0.279486	0.389051	0.243787
Plantago 2,0	4	5	2	1	12		Plantago 2,0	0.333333	0.416667	0.166667	0.0833333		Plantago 2,0	33.3333	41.6667	16.6667	8.33333		Plantago 2,0	0.339837	0.429775	0.167448	0.0834301
	2	7	4	3	16			0.125	0.4375	0.25	0.1875			12.5	43.75	25	18.75			0.125328	0.452817	0.25268	0.188616
	1	6	6	0	13			0.0769231	0.461538	0.461538	0			7.69231	46.1538	46.1538	0			0.0769991	0.479729	0.479729	0
	1	10	7	3	21			0.047619	0.47619	0.333333	0.142857			4.7619	47.619	33.3333	14.2857			0.0476371	0.496317	0.339837	0.143348
	1	6	6	5	18			0.0555556	0.333333	0.333333	0.277778			5.55556	33.3333	33.3333	27.7778			0.0555842	0.339837	0.339837	0.28148
	0	4	5	7	16			0	0.25	0.3125	0.4375			0	25	31.25	43.75			0	0.25268	0.317824	0.452817
	0	3	5	6	14			0	0.214286	0.357143	0.428571			0	21.4286	35.7143	42.8571			0	0.21596	0.365207	0.442911
	2	7	2	10	21			0.0952381	0.333333	0.0952381	0.47619			9.52381	33.3333	9.52381	47.619			0.0953827	0.339837	0.0953827	0.496317
	2	6	3	16	27			0.0740741	0.222222	0.111111	0.592593			7.40741	22.2222	11.1111	59.2593			0.074142	0.224093	0.111341	0.634274
	0	12	8	5	25			0	0.48	0.32	0.2			0	48	32	20			0	0.500655	0.325729	0.201358
	1	8	9	7	25			0.04	0.32	0.36	0.28			4	32	36	28			0.0400107	0.325729	0.368268	0.283794
	2	6	5	8	21			0.0952381	0.285714	0.238095	0.380952			9.52381	28.5714	23.8095	38.0952			0.0953827	0.289752	0.240404	0.390826
	1	3	8	5	17			0.0588235	0.176471	0.470588	0.294118			5.88235	17.6471	47.0588	29.4118			0.0588575	0.1774	0.489957	0.298532
	2	5	9	9	25			0.08	0.2	0.36	0.36			8	20	36	36			0.0800856	0.201358	0.368268	0.368268
	3	7	11	13	34			0.0882353	0.205882	0.323529	0.382353			8.82353	20.5882	32.3529	38.2353			0.0883502	0.207365	0.329457	0.392341
	1	6	6	9	22			0.0454545	0.272727	0.272727	0.409091			4.54545	27.2727	27.2727	40.9091			0.0454702	0.276227	0.276227	0.421458
