# Supplementary material for: Immunosuppressive effect of Plantago major on the innate immunity of Galleria mellonella
Source: PeerJ. 2023 Sep 22;11:e15982. doi: 10.7717/peerj.15982 (PMC10519203; doi:10.7717/peerj.15982)
Supplement: Supplemental Information 3 [file peerj-11-15982-s003.xlsx]

## Sheet: Sayfa1
UNT	PBS	Plantago 0,2	Plantago 0,4	Plantago 0,6	Plantago 0,8	Plantago 1,0	Plantago 1,2	Plantago 1,6	Plantago 2,0
199	181	241	211	251	186	259	217	225	188
231	182	277	219	275	211	152	234	244	227			Untreated	PBS	20 mg mL	40 mg mL	60 mg mL	80 mg mL	100 mg mL	120 mg mL	160 mg mL	200 mg mL
193	276	155	327	244	209	275	205	224	236			210.312	212.812	228.938	236.125	236.562	233.188	227.125	228.812	228.5	229.562
219	271	175	269	266	172	223	273	197	193			3.75	10.66	12.65	10.48	8.72	9.12	8.04	7.51	6.24	7.85
238	212	218	275	266	249	265	257	232	287
231	238	153	198	214	257	247	236	210	244
198	183	184	188	278	225	204	255	214	292
214	166	239	234	192	259	196	283	266	230
189	226	211	265	240	271	216	183	263	211
196	219	289	246	199	254	222	188	177	219
198	186	179	194	239	171	209	213	248	259
221	167	286	310	259	281	262	209	239	188
200	277	247	209	176	246	237	236	203	235
208	238	308	213	248	213	243	194	216	241
213	244	285	206	265	242	231	255	241	197
217	139	216	214	173	285	193	223	257	226
210.312	212.812	228.938	236.125	236.562	233.188	227.125	228.812	228.5	229.562

## Sheet: Sayfa2
Doz	Veri
89	199
89	231
89	193
89	219
89	238
89	231
89	198
89	214
89	189
89	196
89	198
89	221
89	200
89	208
89	213
89	217
90	181
90	182
90	276
90	271
90	212
90	238
90	183
90	166
90	226
90	219
90	186
90	167
90	277
90	238
90	244
90	139
91	241
91	277
91	155
91	175
91	218
91	153
91	184
91	239
91	211
91	289
91	179
91	286
91	247
91	308
91	285
91	216
92	211
92	219
92	327
92	269
92	275
92	198
92	188
92	234
92	265
92	246
92	194
92	310
92	209
92	213
92	206
92	214
93	251
93	275
93	244
93	266
93	266
93	214
93	278
93	192
93	240
93	199
93	239
93	259
93	176
93	248
93	265
93	173
94	186
94	211
94	209
94	172
94	249
94	257
94	225
94	259
94	271
94	254
94	171
94	281
94	246
94	213
94	242
94	285
95	259
95	152
95	275
95	223
95	265
95	247
95	204
95	196
95	216
95	222
95	209
95	262
95	237
95	243
95	231
95	193
96	217
96	234
96	205
96	273
96	257
96	236
96	255
96	283
96	183
96	188
96	213
96	209
96	236
96	194
96	255
96	223
98	225
98	244
98	224
98	197
98	232
98	210
98	214
98	266
98	263
98	177
98	248
98	239
98	203
98	216
98	241
98	257
100	188
100	227
100	236
100	193
100	287
100	244
100	292
100	230
100	211
100	219
100	259
100	188
100	235
100	241
100	197
100	226
