# Supplementary material for: Immunosuppressive effect of Plantago major on the innate immunity of Galleria mellonella
Source: PeerJ. 2023 Sep 22;11:e15982. doi: 10.7717/peerj.15982 (PMC10519203; doi:10.7717/peerj.15982)
Supplement: Supplemental Information 4 [file peerj-11-15982-s004.xlsx]

## Sheet: TP
TP
UNT	0.866882
UNT	0.971574							99	98	97	96	95	94	93	92	90	88
UNT	1.06402							Untreated	PBS	20 mg mL	40 mg mL	60 mg mL	80 mg mL	100 mg mL	120 mg mL	160 mg mL	200 mg mL
UNT	1.04183							1.0053	1.0205	1.0383	1.0543	1.0301	0.9546	1.0129	0.9802	0.9523	0.8095
UNT	1.07557							0.0263186	0.0191333	0.0109281	0.0123328	0.0129609	0.0248	0.065	0.0147	0.0182	0.0347
UNT	1.04761
UNT	1.07326							ab	ab	ab	b	ab	a	ab	ab	a	c
UNT	1.04553
UNT	0.668824
UNT	1.107
UNT	1.02219
UNT	1.02681
UNT	1.02334
UNT	1.02126
UNT	1.05408
UNT	0.974809
PBS	0.967645
PBS	1.05061
PBS	1.02658
PBS	1.05616
PBS	1.05893
PBS	1.04229
PBS	1.10515
PBS	1.0728
PBS	0.773746
PBS	0.993298
PBS	1.03143
PBS	1.03813
PBS	1.03929
PBS	1.07696
PBS	1.04437
PBS	0.951005
Plantago 0,2	1.04899
Plantago 0,2	1.05593
Plantago 0,2	0.942917
Plantago 0,2	0.962098
Plantago 0,2	1.07095
Plantago 0,2	1.0416
Plantago 0,2	1.06656
Plantago 0,2	1.04021
Plantago 0,2	1.11994
Plantago 0,2	1.0171
Plantago 0,2	1.03212
Plantago 0,2	1.06679
Plantago 0,2	1.00948
Plantago 0,2	1.01225
Plantago 0,2	1.08251
Plantago 0,2	1.04322
Plantago 0,4	1.14652
Plantago 0,4	1.04391
Plantago 0,4	1.08875
Plantago 0,4	1.05362
Plantago 0,4	0.969263
Plantago 0,4	1.08089
Plantago 0,4	1.05292
Plantago 0,4	1.04946
Plantago 0,4	1.13751
Plantago 0,4	1.02773
Plantago 0,4	1.06587
Plantago 0,4	1.03813
Plantago 0,4	1.04899
Plantago 0,4	1.09059
Plantago 0,4	1.00254
Plantago 0,4	0.972498
Plantago 0,6	1.14883
Plantago 0,6	1.03651
Plantago 0,6	1.05801
Plantago 0,6	1.0379
Plantago 0,6	1.0416
Plantago 0,6	1.06147
Plantago 0,6	1.03143
Plantago 0,6	0.959556
Plantago 0,6	0.974347
Plantago 0,6	1.02773
Plantago 0,6	1.09522
Plantago 0,6	0.996071
Plantago 0,6	1.05986
Plantago 0,6	1.02935
Plantago 0,6	0.971112
Plantago 0,6	0.950312
Plantago 0,8	0.824821
Plantago 0,8	0.996765
Plantago 0,8	1.04853
Plantago 0,8	0.94569
Plantago 0,8	0.994916
Plantago 0,8	1.00231
Plantago 0,8	0.945228
Plantago 0,8	0.992373
Plantago 0,8	0.630229
Plantago 0,8	0.99584
Plantago 0,8	0.978969
Plantago 0,8	0.999538
Plantago 0,8	1.00878
Plantago 0,8	0.981974
Plantago 0,8	0.933672
Plantago 0,8	0.993298
Plantago 1,0	1.00624
Plantago 1,0	1.02681
Plantago 1,0	0.994916
Plantago 1,0	1.00462
Plantago 1,0	0.987982
Plantago 1,0	1.07696
Plantago 1,0	1.03536
Plantago 1,0	1.02242
Plantago 1,0	1.02635
Plantago 1,0	0.981743
Plantago 1,0	1.03513
Plantago 1,0	0.972498
Plantago 1,0	1.00231
Plantago 1,0	0.990756
Plantago 1,0	1.02357
Plantago 1,0	1.01895
Plantago 1,2	0.943841
Plantago 1,2	1.04599
Plantago 1,2	1.003
Plantago 1,2	0.973423
Plantago 1,2	1.01179
Plantago 1,2	1.02288
Plantago 1,2	0.969956
Plantago 1,2	0.95193
Plantago 1,2	0.809799
Plantago 1,2	1.01687
Plantago 1,2	1.01964
Plantago 1,2	1.01132
Plantago 1,2	1.05339
Plantago 1,2	0.967414
Plantago 1,2	0.953547
Plantago 1,2	0.928819
Plantago 1,6	0.834527
Plantago 1,6	1.03259
Plantago 1,6	1.00462
Plantago 1,6	1.06379
Plantago 1,6	1.01803
Plantago 1,6	1.00393
Plantago 1,6	0.951236
Plantago 1,6	0.975503
Plantago 1,6	0.770511
Plantago 1,6	0.932286
Plantago 1,6	0.921424
Plantago 1,6	0.941299
Plantago 1,6	0.944534
Plantago 1,6	0.928819
Plantago 1,6	0.979431
Plantago 1,6	0.934135
Plantago 2,0	0.701179
Plantago 2,0	0.731454
Plantago 2,0	0.757338
Plantago 2,0	0.798244
Plantago 2,0	0.699792
Plantago 2,0	0.605038
Plantago 2,0	0.602958
Plantago 2,0	0.613127
Plantago 2,0	0.821123
Plantago 2,0	0.923272
Plantago 2,0	0.933903
Plantago 2,0	0.955627
Plantago 2,0	0.983823
Plantago 2,0	0.938757
Plantago 2,0	0.954703
Plantago 2,0	0.932055

## Sheet: SOD
SOD	Değer
Ctrl	0.16119							90	91	92	93	94	95	96	97	98	99
Ctrl	0.111492							Untreated	PBS	20 mg mL	40 mg mL	60 mg mL	80 mg mL	100 mg mL	120 mg mL	160 mg mL	200 mg mL
Ctrl	0.113479							0.187908	0.18775	0.124654	0.0920586	0.0861746	0.107865	0.124819	0.110259	0.105527	0.0994508						Hesap
Ctrl	0.138479							0.00651066	0.00174576	0.00488999	0.00585144	0.00547888	0.00498363	0.0110988	0.00445613	0.0102895	0.00701642						90	0.16119
Ctrl	0.263828							a	a	bc	b	b	bc	bc	bc	c	bc						90	0.111492
Ctrl	0.413715																						90	0.113479
Ctrl	0.210871																						90	0.138479
Ctrl	0.149983																						90	0.263828
Ctrl	0.31285																						90	0.413715
Ctrl	0.158269																						90	0.210871
Ctrl	0.215916																						90	0.149983
Ctrl	0.143994																						90	0.31285
Ctrl	0.161988																						90	0.158269
Ctrl	0.160213																						90	0.215916
Ctrl	0.141402																						90	0.143994
Ctrl	0.148857																						90	0.161988
PBS	0.133791																						90	0.160213
PBS	0.208447																						90	0.141402
PBS	0.181801																						90	0.148857
PBS	0.137166																						91	0.133791
PBS	0.197332																						91	0.208447
PBS	0.178948																						91	0.181801
PBS	0.20677																						91	0.137166
PBS	0.233086																						91	0.197332
PBS	0.206391																						91	0.178948
PBS	0.189335																						91	0.20677
PBS	0.222675																						91	0.233086
PBS	0.194565																						91	0.206391
PBS	0.186761																						91	0.189335
PBS	0.190602																						91	0.222675
PBS	0.185996																						91	0.194565
PBS	0.200341																						91	0.186761
Plantago 0,2	0.13036																						91	0.190602
Plantago 0,2	0.147262																						91	0.185996
Plantago 0,2	0.149459																						91	0.200341
Plantago 0,2	0.123763																						92	0.13036
Plantago 0,2	0.114752																						92	0.147262
Plantago 0,2	0.22783																						92	0.149459
Plantago 0,2	0.199655																						92	0.123763
Plantago 0,2	0.113665																						92	0.114752
Plantago 0,2	0.076247																						92	0.22783
Plantago 0,2	0.09018																						92	0.199655
Plantago 0,2	0.12335																						92	0.113665
Plantago 0,2	0.116991																						92	0.076247
Plantago 0,2	0.0860106																						92	0.09018
Plantago 0,2	0.107956																						92	0.12335
Plantago 0,2	0.108562																						92	0.116991
Plantago 0,2	0.0784205																						92	0.0860106
Plantago 0,4	0.0623962																						92	0.107956
Plantago 0,4	0.0902666																						92	0.108562
Plantago 0,4	0.0737151																						92	0.0784205
Plantago 0,4	0.100884																						93	0.0623962
Plantago 0,4	0.0846503																						93	0.0902666
Plantago 0,4	0.0777867																						93	0.0737151
Plantago 0,4	0.0904014																						93	0.100884
Plantago 0,4	0.0655498																						93	0.0846503
Plantago 0,4	0.115282																						93	0.0777867
Plantago 0,4	0.105749																						93	0.0904014
Plantago 0,4	0.107568																						93	0.0655498
Plantago 0,4	0.0732825																						93	0.115282
Plantago 0,4	0.130588																						93	0.105749
Plantago 0,4	0.0738092																						93	0.107568
Plantago 0,4	0.112694																						93	0.0732825
Plantago 0,4	0.108316																						93	0.130588
Plantago 0,6	0.0925223																						93	0.0738092
Plantago 0,6	0.0837669																						93	0.112694
Plantago 0,6	0.0991104																						93	0.108316
Plantago 0,6	0.0680056																						94	0.0925223
Plantago 0,6	0.0751024																						94	0.0837669
Plantago 0,6	0.0680705																						94	0.0991104
Plantago 0,6	0.0876535																						94	0.0680056
Plantago 0,6	0.0757984																						94	0.0751024
Plantago 0,6	0.0720737																						94	0.0680705
Plantago 0,6	0.0898282																						94	0.0876535
Plantago 0,6	0.0762238																						94	0.0757984
Plantago 0,6	0.0818924																						94	0.0720737
Plantago 0,6	0.142434																						94	0.0898282
Plantago 0,6	0.0813333																						94	0.0762238
Plantago 0,6	0.0868258																						94	0.0818924
Plantago 0,6	0.0981518																						94	0.142434
Plantago 0,8	0.154207																						94	0.0813333
Plantago 0,8	0.0857895																						94	0.0868258
Plantago 0,8	0.0836041																						94	0.0981518
Plantago 0,8	0.0916856																						95	0.154207
Plantago 0,8	0.0660222																						95	0.0857895
Plantago 0,8	0.0698246																						95	0.0836041
Plantago 0,8	0.0837704																						95	0.0916856
Plantago 0,8	0.0720884																						95	0.0660222
Plantago 0,8	0.119008																						95	0.0698246
Plantago 0,8	0.21983																						95	0.0837704
Plantago 0,8	0.112236																						95	0.0720884
Plantago 0,8	0.182215																						95	0.119008
Plantago 0,8	0.0756514																						95	0.21983
Plantago 0,8	0.135001																						95	0.112236
Plantago 0,8	0.0975986																						95	0.182215
Plantago 0,8	0.0773116																						95	0.0756514
Plantago 1,0	0.121894																						95	0.135001
Plantago 1,0	0.11701																						95	0.0975986
Plantago 1,0	0.131204																						95	0.0773116
Plantago 1,0	0.166076																						96	0.121894
Plantago 1,0	0.151103																						96	0.11701
Plantago 1,0	0.138398																						96	0.131204
Plantago 1,0	0.110391																						96	0.166076
Plantago 1,0	0.135384																						96	0.151103
Plantago 1,0	0.132423																						96	0.138398
Plantago 1,0	0.141237																						96	0.110391
Plantago 1,0	0.127145																						96	0.135384
Plantago 1,0	0.116421																						96	0.132423
Plantago 1,0	0.0915108																						96	0.141237
Plantago 1,0	0.0924575																						96	0.127145
Plantago 1,0	0.106062																						96	0.116421
Plantago 1,0	0.118381																						96	0.0915108
Plantago 1,2	0.12894																						96	0.0924575
Plantago 1,2	0.103789																						96	0.106062
Plantago 1,2	0.102759																						96	0.118381
Plantago 1,2	0.13312																						97	0.12894
Plantago 1,2	0.0977361																						97	0.103789
Plantago 1,2	0.103565																						97	0.102759
Plantago 1,2	0.110201																						97	0.13312
Plantago 1,2	0.126966																						97	0.0977361
Plantago 1,2	0.109136																						97	0.103565
Plantago 1,2	0.0674155																						97	0.110201
Plantago 1,2	0.113264																						97	0.126966
Plantago 1,2	0.112897																						97	0.109136
Plantago 1,2	0.0916088																						97	0.0674155
Plantago 1,2	0.0860466																						97	0.113264
Plantago 1,2	0.164701																						97	0.112897
Plantago 1,2	0.111995																						97	0.0916088
Plantago 1,6	0.146259																						98	0.129331
Plantago 1,6	0.0769146																						98	0.197011
Plantago 1,6	0.102713																						98	0.132918
Plantago 1,6	0.112606																						99	0.146259
Plantago 1,6	0.0858748																						99	0.0769146
Plantago 1,6	0.10326																						99	0.102713
Plantago 1,6	0.108101																						99	0.112606
Plantago 1,6	0.151812																						99	0.0858748
Plantago 1,6	0.105866																						99	0.10326
Plantago 1,6	0.101074																						99	0.108101
Plantago 1,6	0.103821																						99	0.151812
Plantago 1,6	0.0889414																						99	0.105866
Plantago 1,6	0.109373																						99	0.101074
Plantago 1,6	0.107109																						99	0.103821
Plantago 1,6	0.0929168																						99	0.0889414
Plantago 1,6	0.091797																						99	0.109373
Plantago 2,0	0.134729																							0.0643784
Plantago 2,0	0.132255																							0.0739836
Plantago 2,0	0.131046																							0.086237
Plantago 2,0	0.0978489																							0.134729
Plantago 2,0	0.123391																							0.132255
Plantago 2,0	0.126529																							0.131046
Plantago 2,0	0.122806																							0.0978489
Plantago 2,0	0.114925																							0.123391
Plantago 2,0	0.0847957																							0.126529
Plantago 2,0	0.0857624																							0.122806
Plantago 2,0	0.0782642																							0.114925
Plantago 2,0	0.0722358																							0.0847957
Plantago 2,0	0.0667666																							0.0857624
Plantago 2,0	0.0718801																							0.0782642
Plantago 2,0	0.0693035																							0.0722358
Plantago 2,0	0.0786757																							0.0667666
																								0.0718801
																								0.0693035
																								0.0786757

## Sheet: LPO
	MDA amount
Untreated	8.15734							90	91	92	93	94	95	96	97	98	99
	9.41615							Untreated	PBS	20 mg mL	40 mg mL	60 mg mL	80 mg mL	100 mg mL	120 mg mL	160 mg mL	200 mg mL						Hesap	MDA amount
	10.0693							9.70782	10.3105	7.65091	8.72513	8.35853	8.48506	9.88814	10.1254	9.77819	9.47721						90	8.15734
	9.19307							0.219686	0.301922	0.337005	0.303577	0.276803	0.425603	0.405529	0.376702	0.380821	0.667528						90	9.41615
	8.99083							abc	a	d	abcd	cd	bcd	abc	ab	abc	abc						90	10.0693
	8.39856																						90	9.19307
	10.0052																						90	8.99083
	10.1726																						90	8.39856
	10.5184																						90	10.0052
	9.21243																						90	10.1726
	9.71678																						90	10.5184
	10.1088																						90	9.21243
	8.92516																						90	9.71678
	11.5041																						90	10.1088
	10.6993																						90	8.92516
	10.237																						90	11.5041
PBS	10.5658																						90	10.6993
	10.6544																						90	10.237
	10.2068																						91	10.5658
	10.5865																						91	10.6544
	9.82553																						91	10.2068
	9.56751																						91	10.5865
	9.09615																						91	9.82553
	10.0759																						91	9.56751
	13.3738																						91	9.09615
	9.28377																						91	10.0759
	9.53986																						91	13.3738
	9.93945																						91	9.28377
	10.8137																						91	9.53986
	8.39868																						91	9.93945
	10.7185																						91	10.8137
	12.322																						91	8.39868
Plantago 0,2	9.7647																						91	10.7185
	8.14181																						91	12.322
	7.00226																						92	9.7647
	6.86946																						92	8.14181
	7.55084																						92	7.00226
	6.94856																						92	6.86946
	8.11726																						92	7.55084
	5.90774																						92	6.94856
	7.99902																						92	8.11726
	10.0612																						92	5.90774
	8.08291																						92	7.99902
	9.41975																						92	10.0612
	7.53223																						92	8.08291
	5.6308																						92	9.41975
	7.82907																						92	7.53223
	5.55696																						92	5.6308
Plantago 0,4	7.34581																						92	7.82907
	8.87349																						92	5.55696
	9.73358																						93	7.34581
	8.40086																						93	8.87349
	5.51356																						93	9.73358
	9.19558																						93	8.40086
	8.39483																						93	5.51356
	9.44288																						93	9.19558
	7.92611																						93	8.39483
	8.42528																						93	9.44288
	9.14515																						93	7.92611
	7.66196																						93	8.42528
	9.58535																						93	9.14515
	9.539																						93	7.66196
	10.3945																						93	9.58535
	10.0241																						93	9.539
Plantago 0,6	8.05493																						93	10.3945
	7.3854																						93	10.0241
	8.78843																						94	8.05493
	7.21771																						94	7.3854
	7.71688																						94	8.78843
	8.49651																						94	7.21771
	9.10744																						94	7.71688
	7.57925																						94	8.49651
	8.17652																						94	9.10744
	8.73994																						94	7.57925
	10.0581																						94	8.17652
	9.65439																						94	8.73994
	9.65491																						94	10.0581
	5.61363																						94	9.65439
	8.78158																						94	9.65491
	8.71081																						94	5.61363
Plantago 0,8	8.96542																						94	8.78158
	11.1797																						94	8.71081
	9.29321																						95	8.96542
	9.48382																						95	11.1797
	6.01631																						95	9.29321
	6.32024																						95	9.48382
	8.68191																						95	6.01631
	6.47455																						95	6.32024
	8.36525																						95	8.68191
	9.14156																						95	6.47455
	8.69723																						95	8.36525
	10.924																						95	9.14156
	9.22563																						95	8.69723
	7.07309																						95	10.924
	10.1883																						95	9.22563
	5.73069																						95	7.07309
Plantago 1,0	8.23967																						95	10.1883
	10.3658																						95	5.73069
	11.2315																						96	8.23967
	11.1445																						96	10.3658
	10.1707																						96	11.2315
	7.77032																						96	11.1445
	7.57987																						96	10.1707
	10.9111																						96	7.77032
	11.7394																						96	7.57987
	13.3057																						96	10.9111
	10.5949																						96	11.7394
	8.61218																						96	13.3057
	9.03212																						96	10.5949
	9.64289																						96	8.61218
	7.84959																						96	9.03212
	10.02																						96	9.64289
Plantago 1,2	11.5453																						96	7.84959
	10.1301																						96	10.02
	10.5545																						97	11.5453
	11.2146																						97	10.1301
	6.68983																						97	10.5545
	8.20217																						97	11.2146
	7.76481																						97	6.68983
	9.74564																						97	8.20217
	12.59																						97	7.76481
	9.28893																						97	9.74564
	10.5061																						97	12.59
	10.9415																						97	9.28893
	11.0084																						97	10.5061
	10.8532																						97	10.9415
	10.8717																						97	11.0084
	10.0995																						97	10.8532
Plantago 1,6	13.3436																						98	9.33103
	9.25452																						98	8.80705
	9.69101																						99	13.5465
	9.67952																						99	7.70537
	9.04485																						99	10.0961
	8.43345																						99	10.2805
	9.91362																						99	13.3721
	9.23812																						99	9.66881
	13.0686																						99	13.4371
	9.40834																						99	13.3265
	10.3944																						99	7.40708
	7.22709																						99	8.22889
	9.53407																						99	7.03275
	10.0818																						99	6.9341
	9.33103																						99	5.08709
	8.80705																						99	8.39079
Plantago 2,0	13.5465
	7.70537
	10.0961
	10.2805
	13.3721
	9.66881
	13.4371
	13.3265
	7.40708
	8.22889
	7.03275
	6.9341
	5.08709
	8.39079
	8.34672
	8.77499

## Sheet: CAT
Hesap	Dakika																							Hesap	Dakika
Untreated	0.00510442				90	91	92	93	94	95	96	97	98	99										90	0.00510442
Untreated	0.00260162				Untreated	PBS	20 mg mL	40 mg mL	60 mg mL	80 mg mL	100 mg mL	120 mg mL	160 mg mL	200 mg mL										90	0.00260162
Untreated	0.00202808				0.00365742	0.00376071	0.00273129	0.00254537	0.00284652	0.00335299	0.00407042	0.0029057	0.00333624	0.00336932										90	0.00202808
Untreated	0.00386909				0.000392584	0.000454503	0.000269684	0.000298131	0.00029222	0.000302685	0.00036719	0.00025658	0.000405051	0.000149346										90	0.00386909
Untreated	0.00351665				ab	ab	ab	a	ab	ab	b	ab	ab	ab										90	0.00351665
Untreated	0.00574558																							90	0.00574558
Untreated	0.00811022																							90	0.00811022
Untreated	0.00249297																							90	0.00249297
Untreated	0.00350738																							90	0.00350738
Untreated	0.00244214																							90	0.00244214
Untreated	0.00268628																							90	0.00268628
Untreated	0.00210157																							90	0.00210157
Untreated	0.00379683																							90	0.00379683
Untreated	0.0033238																							90	0.0033238
Untreated	0.00308805																							90	0.00308805
Untreated	0.00410401																							90	0.00410401
PBS	0.00244305																							91	0.00244305
PBS	0.00751771																							91	0.00751771
PBS	0.00284012																							91	0.00284012
PBS	0.00182508																							91	0.00182508
PBS	0.00384667																							91	0.00384667
PBS	0.0049607																							91	0.0049607
PBS	0.00334573																							91	0.00334573
PBS	0.00617569																							91	0.00617569
PBS	0.0055935																							91	0.0055935
PBS	0.00236165																							91	0.00236165
PBS	0.00151622																							91	0.00151622
PBS	0.0013955																							91	0.0013955
PBS	0.0027529																							91	0.0027529
PBS	0.0032307																							91	0.0032307
PBS	0.00562409																							91	0.00562409
PBS	0.00474213																							91	0.00474213
Plantago 0,2	0.00193																							92	0.00193
Plantago 0,2	0.0039552																							92	0.0039552
Plantago 0,2	0.00171641																							92	0.00171641
Plantago 0,2	0.00295486																							92	0.00295486
Plantago 0,2	0.00233191																							92	0.00233191
Plantago 0,2	0.00249073																							92	0.00249073
Plantago 0,2	0.00289847																							92	0.00289847
Plantago 0,2	0.00233089																							92	0.00233089
Plantago 0,2	0.00387525																							92	0.00387525
Plantago 0,2	0.00151971																							92	0.00151971
Plantago 0,2	0.00253122																							92	0.00253122
Plantago 0,2	0.00396607																							92	0.00396607
Plantago 0,2	0.0023178																							92	0.0023178
Plantago 0,2	0.00539537																							92	0.00539537
Plantago 0,2	0.00137749																							92	0.00137749
Plantago 0,2	0.00210919																							92	0.00210919
Plantago 0,4	0.00213062																							93	0.00213062
Plantago 0,4	0.00192778																							93	0.00192778
Plantago 0,4	0.00131949																							93	0.00131949
Plantago 0,4	0.00578761																							93	0.00578761
Plantago 0,4	0.00262658																							93	0.00262658
Plantago 0,4	0.00288809																							93	0.00288809
Plantago 0,4	0.00458247																							93	0.00458247
Plantago 0,4	0.000762418																							93	0.000762418
Plantago 0,4	0.00185442																							93	0.00185442
Plantago 0,4	0.00273077																							93	0.00273077
Plantago 0,4	0.00184827																							93	0.00184827
Plantago 0,4	0.00277932																							93	0.00277932
Plantago 0,4	0.00267542																							93	0.00267542
Plantago 0,4	0.00220098																							93	0.00220098
Plantago 0,4	0.00224313																							93	0.00224313
Plantago 0,4	0.00236853																							93	0.00236853
Plantago 0,6	0.00199971																							94	0.00199971
Plantago 0,6	0.00142107																							94	0.00142107
Plantago 0,6	0.0040792																							94	0.0040792
Plantago 0,6	0.00234192																							94	0.00234192
Plantago 0,6	0.00356733																							94	0.00356733
Plantago 0,6	0.0017931																							94	0.0017931
Plantago 0,6	0.00203339																							94	0.00203339
Plantago 0,6	0.00254576																							94	0.00254576
Plantago 0,6	0.00211519																							94	0.00211519
Plantago 0,6	0.00252434																							94	0.00252434
Plantago 0,6	0.00367495																							94	0.00367495
Plantago 0,6	0.00204471																							94	0.00204471
Plantago 0,6	0.00519305																							94	0.00519305
Plantago 0,6	0.00282069																							94	0.00282069
Plantago 0,6	0.00216593																							94	0.00216593
Plantago 0,6	0.00522398																							94	0.00522398
Plantago 0,8	0.00369651																							95	0.00369651
Plantago 0,8	0.00298588																							95	0.00298588
Plantago 0,8	0.0055035																							95	0.0055035
Plantago 0,8	0.00295485																							95	0.00295485
Plantago 0,8	0.00297315																							95	0.00297315
Plantago 0,8	0.00261255																							95	0.00261255
Plantago 0,8	0.0027575																							95	0.0027575
Plantago 0,8	0.00254098																							95	0.00254098
Plantago 0,8	0.00476092																							95	0.00476092
Plantago 0,8	0.00468689																							95	0.00468689
Plantago 0,8	0.0056407																							95	0.0056407
Plantago 0,8	0.00329901																							95	0.00329901
Plantago 0,8	0.00133395																							95	0.00133395
Plantago 0,8	0.0020432																							95	0.0020432
Plantago 0,8	0.0031487																							95	0.0031487
Plantago 0,8	0.00270949																							95	0.00270949
Plantago 1,0	0.00552397																							96	0.00552397
Plantago 1,0	0.00342981																							96	0.00342981
Plantago 1,0	0.00225423																							96	0.00225423
Plantago 1,0	0.00295046																							96	0.00295046
Plantago 1,0	0.00635002																							96	0.00635002
Plantago 1,0	0.00252715																							96	0.00252715
Plantago 1,0	0.00278091																							96	0.00278091
Plantago 1,0	0.00324297																							96	0.00324297
Plantago 1,0	0.00418732																							96	0.00418732
Plantago 1,0	0.00432817																							96	0.00432817
Plantago 1,0	0.00370089																							96	0.00370089
Plantago 1,0	0.00567823																							96	0.00567823
Plantago 1,0	0.00215294																							96	0.00215294
Plantago 1,0	0.00557971																							96	0.00557971
Plantago 1,0	0.00662666																							96	0.00662666
Plantago 1,0	0.00381319																							96	0.00381319
Plantago 1,2	0.00512493																							97	0.00512493
Plantago 1,2	0.00177328																							97	0.00177328
Plantago 1,2	0.00211519																							97	0.00211519
Plantago 1,2	0.00365528																							97	0.00365528
Plantago 1,2	0.0037683																							97	0.0037683
Plantago 1,2	0.00358521																							97	0.00358521
Plantago 1,2	0.00128736																							97	0.00128736
Plantago 1,2	0.00138815																							97	0.00138815
Plantago 1,2	0.00347316																							97	0.00347316
Plantago 1,2	0.00182406																							97	0.00182406
Plantago 1,2	0.00281188																							97	0.00281188
Plantago 1,2	0.00347633																							97	0.00347633
Plantago 1,2	0.00321093																							97	0.00321093
Plantago 1,2	0.00341482																							97	0.00341482
Plantago 1,2	0.00259995																							97	0.00259995
Plantago 1,2	0.00298242																							97	0.00298242
Plantago 1,6	0.00330487																							99	0.00358231
Plantago 1,6	0.00199589																							99	0.00313248
Plantago 1,6	0.00418736																							99	0.00316949
Plantago 1,6	0.00235901																							99	0.00316654
Plantago 1,6	0.00200657																							99	0.00296238
Plantago 1,6	0.00222192																							99	0.00435803
Plantago 1,6	0.0021156																							99	0.0038302
Plantago 1,6	0.00316902																							99	0.00390508
Plantago 1,6	0.00807933																							99	0.0030783
Plantago 1,6	0.00498689																							99	0.00262612
Plantago 1,6	0.00254586																							99	0.00287532
Plantago 1,6	0.00402472																							99	0.00351402
Plantago 1,6	0.003228																							99	0.0031299
Plantago 1,6	0.00471183																							99	0.00249886
Plantago 1,6	0.00164623																							99	0.00336505
Plantago 1,6	0.00279674																							99	0.00471499
Plantago 2,0	0.00358231
Plantago 2,0	0.00313248
Plantago 2,0	0.00316949
Plantago 2,0	0.00316654
Plantago 2,0	0.00296238
Plantago 2,0	0.00435803
Plantago 2,0	0.0038302
Plantago 2,0	0.00390508
Plantago 2,0	0.0030783
Plantago 2,0	0.00262612
Plantago 2,0	0.00287532
Plantago 2,0	0.00351402
Plantago 2,0	0.0031299
Plantago 2,0	0.00249886
Plantago 2,0	0.00336505
Plantago 2,0	0.00471499

## Sheet: PO
	Per min PO
Untreated	0.0352368
Untreated	0.0244915			Untreated	PBS	20 mg mL	40 mg mL	60 mg mL	80 mg mL	100 mg mL	120 mg mL	160 mg mL	200 mg mL
Untreated	0.0273858			0.0305716	0.0317559	0.0190838	0.0137389	0.0369876	0.0364174	0.0508216	0.0488836	0.0627417	0.0657884
Untreated	0.018074			0.00233	0.00177	0.0018	0.00189	0.00311	0.00548	0.00483	0.00619	0.00502	0.00663
Untreated	0.0126909
Untreated	0.0487778
Untreated	0.027139
Untreated	0.0303374
Untreated	0.0485494
Untreated	0.0378157
Untreated	0.0275082
Untreated	0.0322756
Untreated	0.0262429
Untreated	0.0287598
Untreated	0.0311578
Untreated	0.0327029
PBS	0.0364789
PBS	0.0241104
PBS	0.0334211
PBS	0.0264891
PBS	0.0333386
PBS	0.027034
PBS	0.0248545
PBS	0.0207495
PBS	0.0494744
PBS	0.0330844
PBS	0.0257578
PBS	0.033611
PBS	0.03572
PBS	0.0298037
PBS	0.0347105
PBS	0.0395021
Plantago 0,2	0.0189515
Plantago 0,2	0.0134264
Plantago 0,2	0.0191236
Plantago 0,2	0.0131885
Plantago 0,2	0.0246417
Plantago 0,2	0.0261201
Plantago 0,2	0.037992
Plantago 0,2	0.0179989
Plantago 0,2	0.0144007
Plantago 0,2	0.0165129
Plantago 0,2	0.0184474
Plantago 0,2	0.0242391
Plantago 0,2	0.0150752
Plantago 0,2	0.0187681
Plantago 0,2	0.0213997
Plantago 0,2	0.00505488
Plantago 0,4	0.0102612
Plantago 0,4	0.00324102
Plantago 0,4	0.0118944
Plantago 0,4	0.0126232
Plantago 0,4	0.0183824
Plantago 0,4	0.00199466
Plantago 0,4	0.0152952
Plantago 0,4	0.0103965
Plantago 0,4	0.00836096
Plantago 0,4	0.0217819
Plantago 0,4	0.014028
Plantago 0,4	0.0343617
Plantago 0,4	0.0190894
Plantago 0,4	0.0143903
Plantago 0,4	0.0120793
Plantago 0,4	0.0116415
Plantago 0,6	0.0179016
Plantago 0,6	0.0395614
Plantago 0,6	0.0375404
Plantago 0,6	0.0430876
Plantago 0,6	0.0380377
Plantago 0,6	0.0361912
Plantago 0,6	0.0568589
Plantago 0,6	0.022211
Plantago 0,6	0.0465303
Plantago 0,6	0.0501116
Plantago 0,6	0.0411523
Plantago 0,6	0.0316805
Plantago 0,6	0.0377831
Plantago 0,6	0.00706335
Plantago 0,6	0.040073
Plantago 0,6	0.0460179
Plantago 0,8	0.0584054
Plantago 0,8	0.048012
Plantago 0,8	0.0546764
Plantago 0,8	0.0164719
Plantago 0,8	0.0197705
Plantago 0,8	0.0126827
Plantago 0,8	0.0147767
Plantago 0,8	0.0541685
Plantago 0,8	0.0736325
Plantago 0,8	0.0555544
Plantago 0,8	0.0475357
Plantago 0,8	0.0561753
Plantago 0,8	0.013707
Plantago 0,8	0.0379331
Plantago 0,8	0.00873683
Plantago 0,8	0.0104393
Plantago 1,0	0.0562046
Plantago 1,0	0.0698813
Plantago 1,0	0.0733503
Plantago 1,0	0.0531503
Plantago 1,0	0.0306078
Plantago 1,0	0.0372221
Plantago 1,0	0.0312986
Plantago 1,0	0.0400841
Plantago 1,0	0.0167871
Plantago 1,0	0.0504104
Plantago 1,0	0.0626518
Plantago 1,0	0.0492484
Plantago 1,0	0.0524767
Plantago 1,0	0.0509503
Plantago 1,0	0.0409735
Plantago 1,0	0.097849
Plantago 1,2	0.104138
Plantago 1,2	0.0853303
Plantago 1,2	0.0523753
Plantago 1,2	0.100748
Plantago 1,2	0.0332501
Plantago 1,2	0.0344452
Plantago 1,2	0.0378883
Plantago 1,2	0.0285119
Plantago 1,2	0.0141764
Plantago 1,2	0.0166865
Plantago 1,2	0.0185816
Plantago 1,2	0.0781082
Plantago 1,2	0.0305903
Plantago 1,2	0.015885
Plantago 1,2	0.0976354
Plantago 1,2	0.0337884
Plantago 1,6	0.0445544
Plantago 1,6	0.0402314
Plantago 1,6	0.058076
Plantago 1,6	0.0741584
Plantago 1,6	0.0543208
Plantago 1,6	0.0684117
Plantago 1,6	0.0648042
Plantago 1,6	0.0597452
Plantago 1,6	0.0439847
Plantago 1,6	0.0938114
Plantago 1,6	0.0424872
Plantago 1,6	0.0672664
Plantago 1,6	0.116848
Plantago 1,6	0.0583256
Plantago 1,6	0.0686589
Plantago 1,6	0.0481829
Plantago 2,0	0.0660849
Plantago 2,0	0.0964986
Plantago 2,0	0.113204
Plantago 2,0	0.130342
Plantago 2,0	0.0609032
Plantago 2,0	0.0401389
Plantago 2,0	0.0869771
Plantago 2,0	0.113735
Plantago 2,0	0.0240317
Plantago 2,0	0.036827
Plantago 2,0	0.0558821
Plantago 2,0	0.0353779
Plantago 2,0	0.0385829
Plantago 2,0	0.0837356
Plantago 2,0	0.0185967
Plantago 2,0	0.0516973
